# Supplementary material for: A Persistence Detector for Metabolic Network Rewiring in an Animal
Source: PubMed Central journal article supplement — Cell Rep. Author manuscript; Available in PMC 2019 Feb 8. (PMC6368391; doi:10.1016/j.celrep.2018.12.064), 2019-01-08
Supplement: NIHMS1518281-supplement-1.pdf [file NIHMS1518281-supplement-1.pdf]

**Cell Reports, Volume 26**

**Supplemental Information**

**A Persistence Detector for Metabolic**

**Network Rewiring in an Animal**

**Jote T. Bulcha, Gabrielle E. Giese, Md. Zufikar Ali, Yong-Uk Lee, Melissa D. Walker, Amy D. Holdorf, L. Safak Yilmaz, Robert C. Brewster, and Albertha J.M. Walhout**

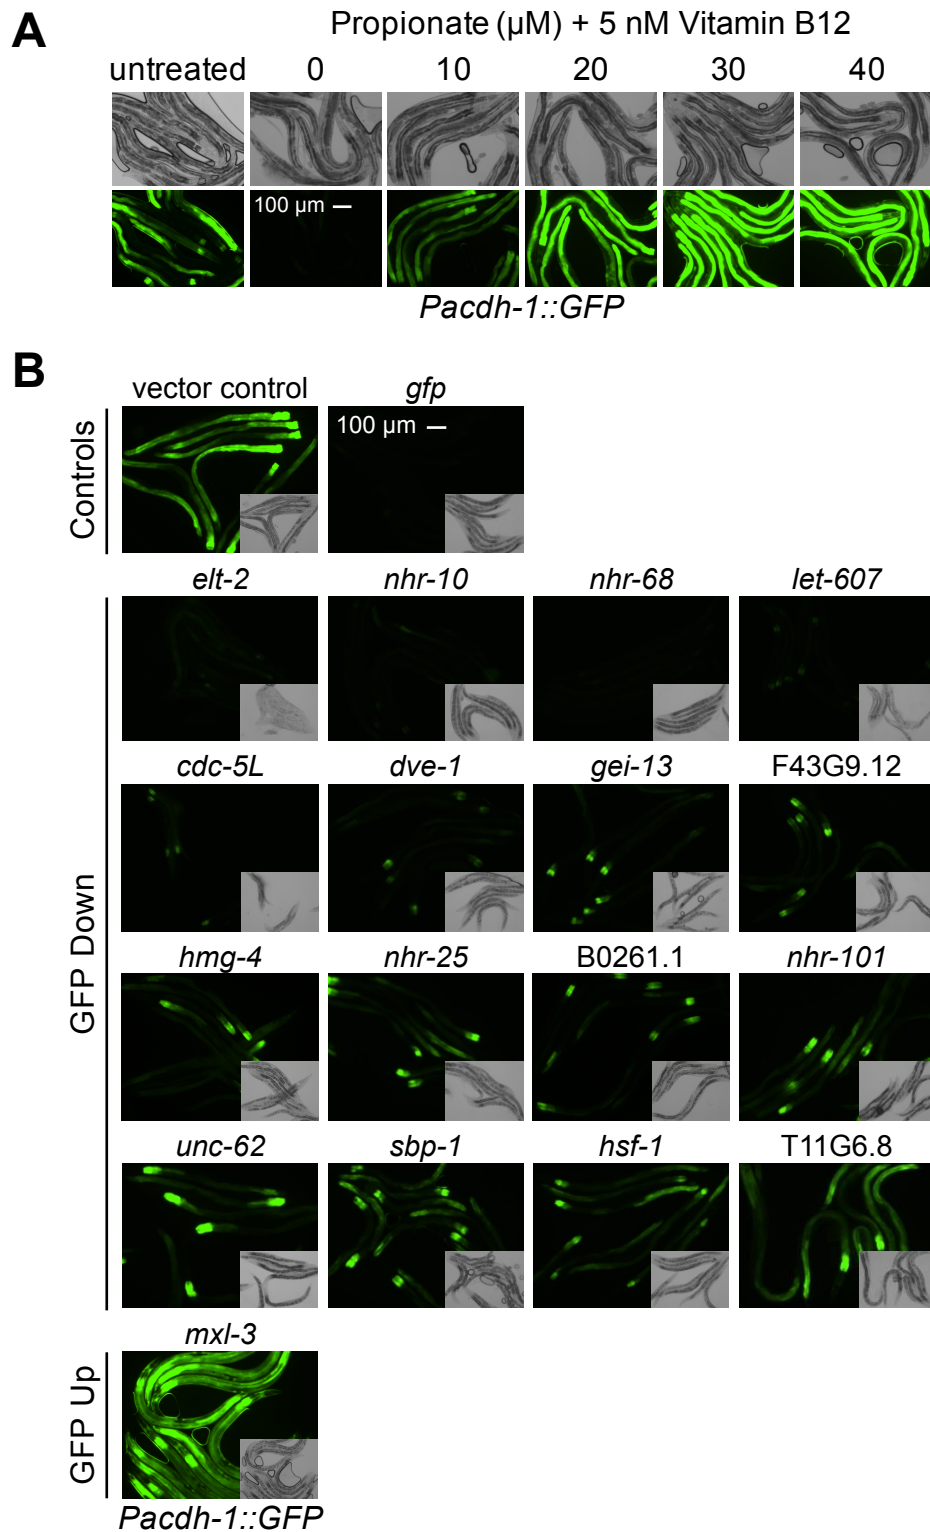

**Figure S1. Results of the TF RNAi screen for the increase or decrease of GFP expression in *Pacdh-1::GFP* transgenic animals in the presence of propionate. Related to Figure 2.**

(A) Fluorescence microscopy images (bottom) show that 5 nM vitamin B12 represses *Pacdh-1::GFP* while propionate supplementation in the presence of 5 nM vitamin B12 induces reporter activation in a dose dependent manner. Top images show DIC controls.

(B) Fluorescence microscopy images of all 17 TF RNAi experiments performed side-by-side with untreated animals and with animals supplemented with 5 nM vitamin B12 and 40 mM propionate. Insets show DIC images.

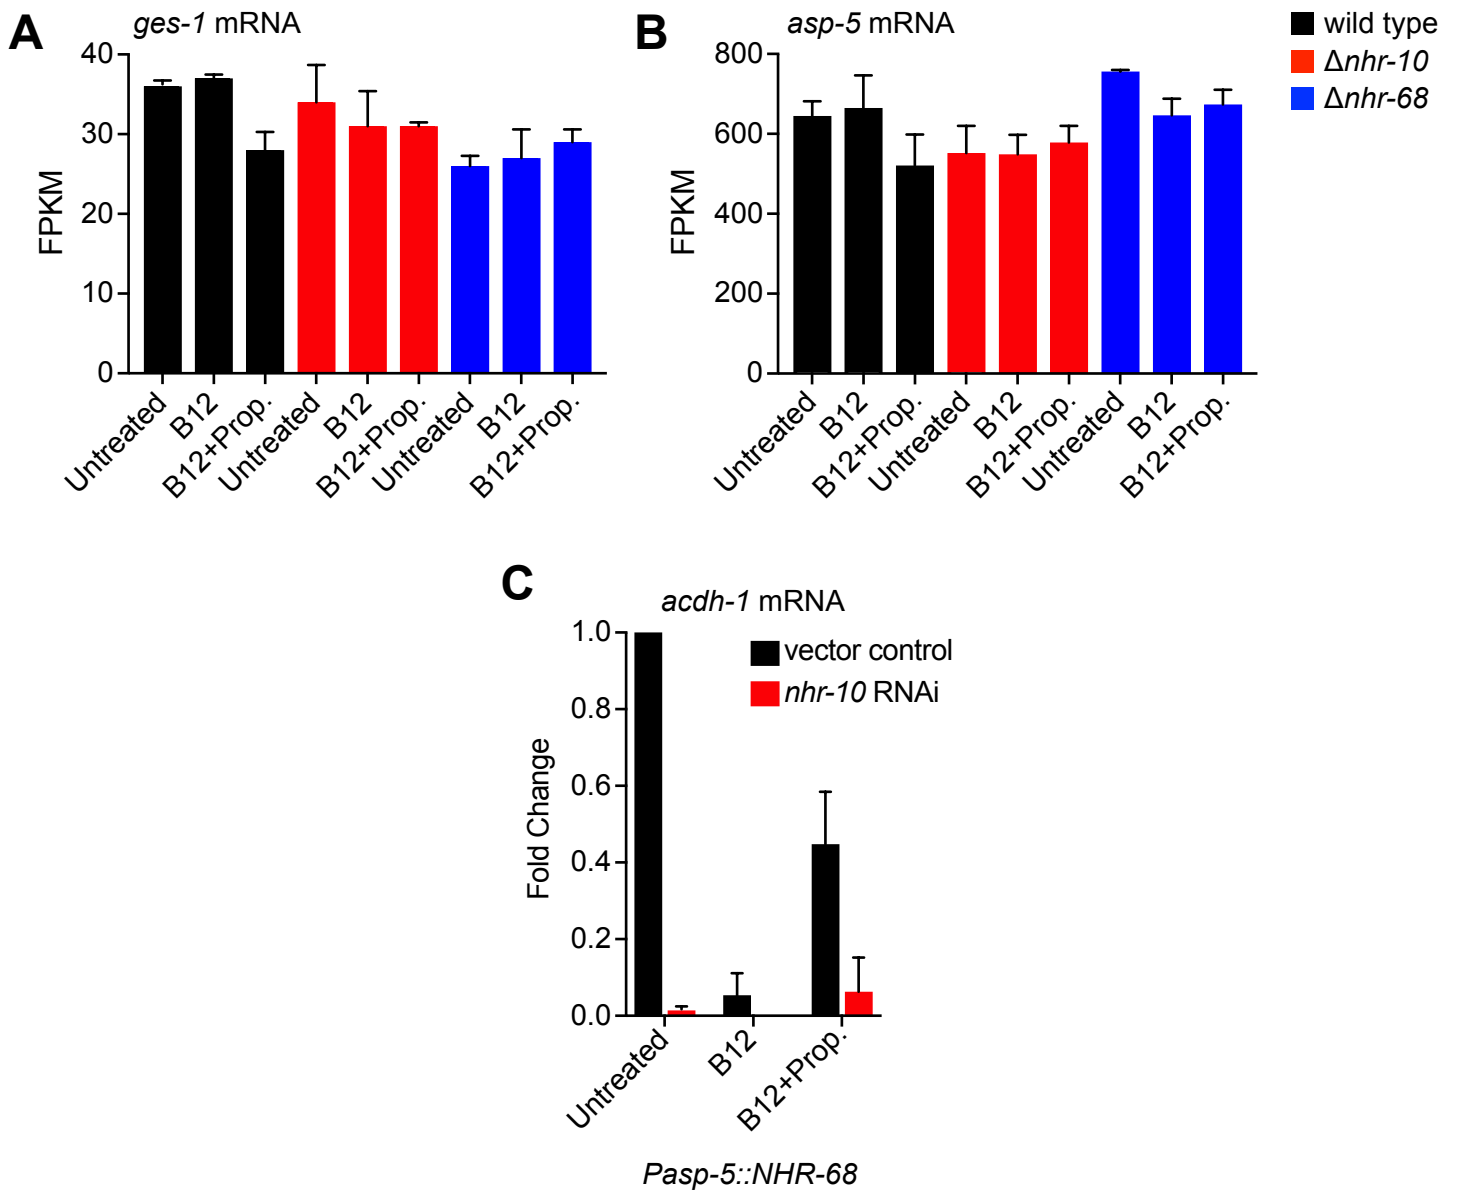

**Figure S2: Expression levels of *ges-1* and *asp-5* are not affected by vitamin B12, propionate, *nhr-10*, or *nhr-68*. Related to Figure 4.**

(A, B) Bar-graph of RNA-seq fragments per kilobase of transcript per million mapped reads (FPKM) data showing that expression levels of intestinal genes *ges-1* (low expression) and *asp-5* (high expression) are not affected by 20 nM vitamin B12, 40 mM propionate, *nhr-10* deletion, or *nhr-68* deletion.

(C) qRT-PCR showing that constitutive intestinal expression (*asp-5* promoter) of NHR-68 does not induce *acdh-1* expression in response to propionate. All measurements are statistically significantly different compared to untreated vector control as determined by two-tailed paired Student's t-test ( $P < 0.05$ ).

| Sequence Name | Gene Name      | Fold Change WT+B12 / WT (log2) | P-Adj    | Fold Change WT+B12+Prop / WT+B12 (log2) | P-Adj    | Fold Change <i>nhr-10</i> +B12+Prop / WT+B12+Prop | P-Adj    | Fold Change <i>Δnhr-68</i> +B12+Prop / WT+B12+Prop | P-Adj    |
|---------------|----------------|--------------------------------|----------|-----------------------------------------|----------|---------------------------------------------------|----------|----------------------------------------------------|----------|
| F38A5.14      | <i>nspb-1</i>  | -5.94692                       | 7.10E-09 | 6.8226                                  | 0        | -0.4181                                           | 0.935    | 1.51663                                            | 0.0880   |
| C17C3.12      | <i>acd-2</i>   | -4.32705                       | 0        | 5.7681                                  | 0        | -9.1129                                           | 0        | 1.62773                                            | 0.8756   |
| C55B7.4       | <i>acd-1</i>   | -4.57147                       | 0        | 4.1611                                  | 0        | -12.4294                                          | 0        | -9.6212                                            | 0        |
| C14F5.2       | <i>zig-3</i>   | -4.70019                       | 2.65E-04 | 4.0482                                  | 1.30E-10 | -3.5210                                           | 1.73E-09 | -4.3169                                            | 6.96E-12 |
| T13F3.6       | T13F3.6        | -3.42797                       | 2.05E-11 | 3.9539                                  | 9.68E-10 | -0.7734                                           | 0.379    | 1.86737                                            | 0.0668   |
| F09F7.4       | <i>hach-1</i>  | -1.90083                       | 1.42E-03 | 2.7035                                  | 0        | -3.1621                                           | 0        | -2.3058                                            | 0        |
| T07D3.9       | T07D3.9        | -0.90883                       | 1.36E-03 | 2.6420                                  | 0        | -2.8422                                           | 0        | -2.7636                                            | 0        |
| T05E12.7      | <i>srh-237</i> | -4.11875                       | 0        | 2.5031                                  | 1.52E-05 | -4.2733                                           | 1.08E-11 | -3.2203                                            | 1.02E-08 |
| F02E8.4       | F02E8.4        | -1.38412                       | 1.96E-03 | 2.4301                                  | 1.85E-10 | -0.0762                                           | 0.961    | 0.9924                                             | 5.44E-14 |
| T05G5.6       | <i>ech-6</i>   | -2.07524                       | 3.42E-06 | 2.2079                                  | 0        | -2.9039                                           | 0        | -2.2165                                            | 0        |
| Y38F1A.6      | <i>hphd-1</i>  | -2.15322                       | 3.00E-15 | 2.1450                                  | 0        | -4.2685                                           | 0        | -3.6272                                            | 0        |
| R06C7.4       | <i>cpg-3</i>   | -1.15400                       | 1.45E-05 | 1.8805                                  | 8.78E-05 | -0.4761                                           | 0.965    | 0.25138                                            | 0.9711   |
| F37B4.7       | <i>fol-2</i>   | -1.60076                       | 0        | 1.7434                                  | 0        | -5.8406                                           | 0        | -2.0716                                            | 0        |
| C23H5.8       | C23H5.8        | -0.92923                       | 1.46E-06 | 1.6491                                  | 0        | -3.2100                                           | 0        | -2.0744                                            | 0        |
| T10H9.5       | <i>pmp-5</i>   | -2.50304                       | 0        | 1.5272                                  | 1.08E-04 | -2.9140                                           | 7.77E-16 | -2.3058                                            | 3.14E-11 |
| W01B11.6      | W01B11.6       | -2.15102                       | 0        | 1.3826                                  | 3.69E-03 | -0.2024                                           | 0.931    | -0.32831                                           | 0.9183   |
| T01H3.4       | <i>perm-1</i>  | -0.90649                       | 9.11E-14 | 1.3658                                  | 3.58E-10 | -0.4194                                           | 0.852    | 0.23760                                            | 0.7895   |
| F31F4.15      | <i>fbxa-72</i> | -2.48535                       | 8.08E-05 | 1.3428                                  | 2.05E-14 | -0.1178                                           | 0.957    | -0.7745                                            | 4.42E-06 |
| F10D2.9       | <i>fat-7</i>   | -0.63870                       | 1.28E-03 | 1.2462                                  | 1.13E-13 | 0.0236                                            | 0.988    | -0.56937                                           | 0.0268   |
| C55B7.9       | <i>mdt-18</i>  | -1.47825                       | 0        | 1.2045                                  | 6.23E-12 | -0.8590                                           | 3.38E-06 | -0.9945                                            | 1.33E-10 |
| F18E2.1       | <i>pap-1</i>   | -0.89541                       | 4.44E-16 | 0.9887                                  | 1.11E-16 | -1.7482                                           | 0        | -1.6519                                            | 0        |
| F28A12.4      | <i>asp-13</i>  | -1.59904                       | 0        | 0.9812                                  | 0        | -1.0392                                           | 0        | -1.2286                                            | 0        |
| VF13D12L.3    | VF13D12L.3     | -0.61847                       | 3.69E-13 | 0.6299                                  | 4.11E-14 | -0.8205                                           | 0        | 0.10498                                            | 0.9785   |

**Table S1, related to Figure 3:** RNA-seq fold change and P-adjusted values for the 23 genes up regulated by propionate and down regulated by vitamin B12 in wild type animals.

| <b>Genotyping</b>     | <b>Forward</b>               | <b>Reverse</b>             |
|-----------------------|------------------------------|----------------------------|
| <i>acd1(ok1489)</i>   | CTTCCAGCTAATGGGTGTTTCATGTTCC | CGCCATTGCAGCTTCTCGTAC      |
| <i>pcca-1(ok2282)</i> | GGGGCAACAAAACAGGGTGGTG       | CGAGCTTGAGAAGGCTGGAGC      |
| <i>nhr-10(tm4695)</i> | GCATACTCTAGAGGATCAAGCACC     | GTTTTCCGCGAATTCTCATTCCG    |
| <i>nhr-68(gk708)</i>  | GTTTTCTTTTTTCAACTGCACCATGTG  | CAATCACAGCCATTAATGTCTGCATG |
| MosSCI insert         | TCTGGCTCTGCTTCTTCGTT         | CAATTCATCCCGGTTTCTGT       |

| <b>qRT-PCR</b>         | <b>Forward</b>       | <b>Reverse</b>           |
|------------------------|----------------------|--------------------------|
| <i>acd1</i>            | GCAAATGCAGATCCTAGCC  | GTTTGTCTTCCTCCTTATCTACAG |
| <i>nhr-68</i>          | GCAATTTACAGATTTGGGCG | GCAATCCAAACAGCTTCCT      |
| <i>ama-1</i> (control) | AATATCTCGCAGGTTATCGC | GTGTACGATGACGGAAACC      |
| <i>act-1</i> (control) | CTCTTGCCCATCAACCATG  | CTTGCTTGGAGATCCACATC     |

**Table S2, related to the STAR Methods:** All DNA oligonucleotides used in this study.
