# Supplementary material for: A Persistence Detector for Metabolic Network Rewiring in an Animal
Source: PubMed Central journal article supplement — Cell Rep. Author manuscript; Available in PMC 2019 Feb 8. (PMC6368391; doi:10.1016/j.celrep.2018.12.064), 2019-01-08
Supplement: NIHMS1518281-supplement-2.pdf [file NIHMS1518281-supplement-2.pdf]

# A Persistence Detector for Metabolic Network Rewiring in an Animal

## Graphical Abstract

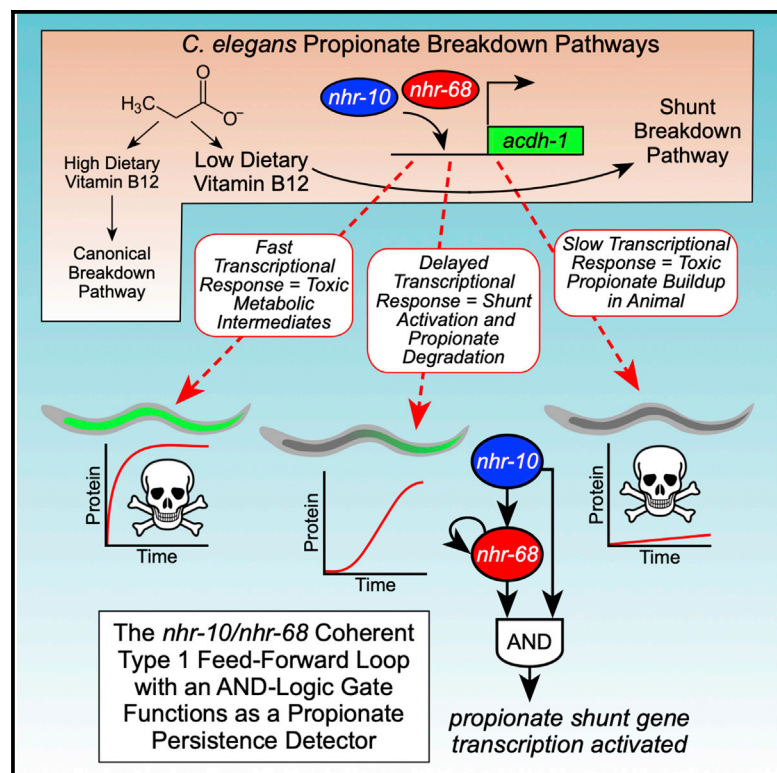

## Authors

Jote T. Bulcha, Gabrielle E. Giese, Md. Zulfikar Ali, ..., L. Safak Yilmaz, Robert C. Brewster, Albertha J.M. Walhout

## Correspondence

marian.walhout@umassmed.edu

## In Brief

Bulcha et al. discover a transcriptional persistence detector composed of a type 1 coherent feed-forward loop with an AND-logic gate that rewires propionate metabolism in *C. elegans*.

## Highlights

- A transcriptional persistence detector activates propionate shunt only when needed
- Persistence detection prevents generation of toxic shunt intermediates
- *nhr-10* and *nhr-68* are persistence detectors in a feed-forward loop with AND-logic gate
- *nhr-68* autoactivates and modeling shows that this can provide circuit tunability

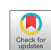

# A Persistence Detector for Metabolic Network Rewiring in an Animal

Jote T. Bulcha,<sup>1</sup> Gabrielle E. Giese,<sup>1</sup> Md. Zufikar Ali,<sup>1</sup> Yong-Uk Lee,<sup>1</sup> Melissa D. Walker,<sup>1</sup> Amy D. Holdorf,<sup>1</sup> L. Safak Yilmaz,<sup>1</sup> Robert C. Brewster,<sup>1,2</sup> and Albertha J.M. Walhout<sup>1,3,4,\*</sup>

<sup>1</sup>Program in Systems Biology, University of Massachusetts Medical School, Worcester, MA 01605, USA

<sup>2</sup>Department of Microbiology and Physiological Systems, University of Massachusetts Medical School, Worcester, MA 01605, USA

<sup>3</sup>Program in Molecular Medicine, University of Massachusetts Medical School, Worcester, MA 01605, USA

<sup>4</sup>Lead Contact

\*Correspondence: [marian.walhout@umassmed.edu](mailto:marian.walhout@umassmed.edu)

<https://doi.org/10.1016/j.celrep.2018.12.064>

## SUMMARY

Biological systems must possess mechanisms that prevent inappropriate responses to spurious environmental inputs. *Caenorhabditis elegans* has two breakdown pathways for the short-chain fatty acid propionate: a canonical, vitamin B12-dependent pathway and a propionate shunt that is used when vitamin B12 levels are low. The shunt pathway is kept off when there is sufficient flux through the canonical pathway, likely to avoid generating shunt-specific toxic intermediates. Here, we discovered a transcriptional regulatory circuit that activates shunt gene expression upon propionate buildup. Nuclear hormone receptor 10 (NHR-10) and NHR-68 function together as a “persistence detector” in a type 1, coherent feed-forward loop with an AND-logic gate to delay shunt activation upon propionate accumulation and to avoid spurious shunt activation in response to a non-sustained pulse of propionate. Together, our findings identify a persistence detector in an animal, which transcriptionally rewires propionate metabolism to maintain homeostasis.

## INTRODUCTION

Propionate is a three-carbon, short-chain fatty acid that is generated by the breakdown of odd-chain fatty acids and branched-chain amino acids. Propionate is toxic when it accumulates and is eliminated from the body by a breakdown pathway that uses vitamin B12 as a co-factor (Deodato et al., 2006).

The nematode *Caenorhabditis elegans* is a bacterivore that can grow on a variety of diets that can be high or low in vitamin B12. This metabolic flexibility is enabled in part because *C. elegans* has two propionate breakdown pathways: the canonical vitamin B12-dependent pathway and an alternate pathway, or shunt, that is used under low vitamin B12 dietary conditions or when flux through the canonical pathway is genetically perturbed (Watson et al., 2013, 2014, 2016) (Figure 1A). The co-occurrence of two parallel pathways begs the question of why the animal has maintained the canonical propionate breakdown pathway. In other words, why not just use the propionate shunt?

When *C. elegans* is grown on bacterial diets with high levels of vitamin B12, expression of the five propionate shunt genes is low, with the first gene in the pathway, *acdH-1*, being almost off (Watson et al., 2014, 2016). This indicates that the animal strongly prefers to use the canonical pathway and prevents activation of the shunt pathway when it is not needed.

One reason for keeping flux through the propionate shunt pathway low when it is not needed is that intermediates in this pathway can be toxic when they accumulate. For instance, the first step in the propionate shunt involves the conversion of propionyl-coenzyme A (CoA) into acrylyl-CoA, which can be converted into the highly toxic intermediate acrylate upon dissociation of the CoA. Animals in which *ech-6*, encoding the enzyme that metabolizes acrylyl-CoA (Figure 1A), is perturbed are very sick, whereas a double perturbation of *ech-6* and *acdH-1*, encoding the enzyme that generates acrylyl-CoA, rescues this sickness, as the perturbation of *acdH-1* prevents the production of acrylate in the first place (Watson et al., 2016) (Figure 1A).

How does *C. elegans* ensure that the propionate shunt is kept off and is only activated when it is really needed? Here, we identify two nuclear hormone receptors (NHRs), *nhr-10* and *nhr-68*, that are both transcriptionally and functionally important for the activation of shunt gene expression in response to the excessive accumulation of propionate. We find that *nhr-10* activates *nhr-68* and that *nhr-68* expression alone is not sufficient to drive propionate shunt gene activation, i.e., both *nhr-10* and *nhr-68* are required, indicating that they do not act in a simple linear pathway. Together, our findings indicate that *nhr-10* and *nhr-68* function together in a gene regulatory network circuit known as a feed-forward loop (FFL) with an AND-logic gate. Previous modeling by Uri Alon has led to the specific prediction that FFLs with AND-logic gates will generate a delay in target gene activation and that a short pulse of input is not sufficient to activate target gene expression, and, therefore, such circuits have been named “persistence detectors” (Alon, 2007). However, with the exception of the L-arabinose utilization system in *Escherichia coli* (Mangan and Alon, 2003), the existence and importance of transcriptional persistence detector circuits in multicellular organisms has remained unclear. We demonstrate that the *nhr-10/nhr-68* circuit functions as a persistence detector in several ways. First, there is a ~3-hr delay in propionate shunt activation upon the supplementation of propionate. Second, a 1-hr pulse of propionate is not sufficient to activate propionate shunt gene expression. Finally, we show that NHR-68 overexpression is not sufficient to

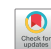

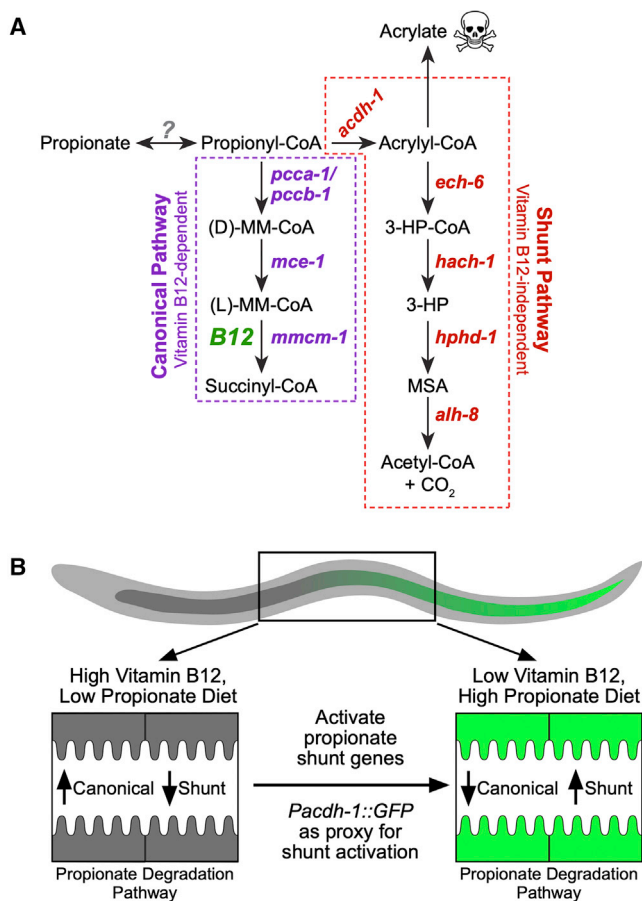

**Figure 1. Two *C. elegans* Propionate Breakdown Pathways That Function in the Animal's Intestine**

(A) Cartoon of *C. elegans* propionate breakdown pathways. B12, vitamin B12; 3-HP, 3-hydroxypropionate; MM-CoA, methylmalonyl-CoA; MSA, malonic semialdehyde.

(B) Cartoon of the activation of propionate shunt expression in the 20-cell *C. elegans* intestine under different dietary conditions.

activate propionate shunt gene expression in response to propionate, demonstrating that the two NHRs do not function in a simple linear pathway. We propose that the propionate persistence detector functions to ensure that the propionate shunt stays off unless propionate accumulation is persistent, thereby preventing the unwanted generation of highly toxic shunt intermediates. This gene regulatory network architecture links dietary input to metabolic output to ensure animal homeostasis.

## RESULTS

### The Nuclear Hormone Receptors *nhr-10* and *nhr-68* Activate Propionate Shunt Gene Expression in Response to Propionate

Propionate is generated and broken down in the *C. elegans* intestine, an organ composed of precisely 20 cells that functions both as the animal's gut and its liver (Figure 1B). Our previous data indicate that the animal strongly prefers to use the canonical, vitamin B12-dependent propionate breakdown pathway and

that it has tight control mechanisms to keep the propionate shunt pathway off unless it is needed, such as under persistently low vitamin B12 conditions. We have used a transgenic *C. elegans* strain that expresses the GFP under the control of the *acdh-1* gene promoter as a proxy for shunt gene expression (Arda et al., 2010; MacNeil et al., 2013; Watson et al., 2013, 2014, 2016). *acdh-1* encodes an acyl-CoA dehydrogenase that catalyzes the first reaction in the propionate shunt pathway and is most highly expressed in the *C. elegans* intestine (Arda et al., 2010; MacNeil et al., 2013; Watson et al., 2013, 2014, 2016). When these transgenic animals are fed a bacterial diet that is low in vitamin B12, intestinal GFP expression is high, whereas GFP levels are low on diets high in vitamin B12 (MacNeil et al., 2013; Watson et al., 2014, 2016) (Figure 1B). In addition, GFP expression is activated when genes in the canonical propionate breakdown pathway are genetically perturbed, even in the presence of vitamin B12, or when propionate is supplemented to high vitamin B12 bacterial diets (Watson et al., 2013, 2014, 2016). We have previously used the *Pacdh-1::GFP* strain in the context of defining a *C. elegans* intestinal gene regulatory network by comprehensive transcription factor (TF) RNAi, and found more than 40 TFs that activate the *acdh-1* promoter in the absence of exogenously supplemented propionate (MacNeil et al., 2015). However, it is not clear whether all or only a subset of these TFs specifically mediate the transcriptional response to propionate.

To identify the TFs that specifically activate *acdh-1* expression in response to propionate, we tested the previously found TFs in the presence of both vitamin B12 (to repress basal GFP expression) and propionate (to specifically activate GFP expression) (Figure S1A). Interestingly, we found that RNAi of only a subset of the 43 TFs that affected GFP expression under untreated conditions also affected GFP levels on propionate supplemented conditions (Figures 2A and S1B). Specifically, RNAi of 16 TFs reduced GFP expression under both conditions, RNAi of 26 TFs only repressed GFP expression on untreated conditions, and RNAi of one TF, *mxl-3*, reduced GFP expression on untreated conditions but activated the *acdh-1* promoter on propionate-supplemented conditions. These results indicate that the *acdh-1* promoter not only responds to excess propionate but to other cellular conditions as well and that the response to these other conditions involves other TFs.

Several of the 16 TFs that reduce GFP expression when knocked down by RNAi function at high levels in the intestinal gene regulatory network and likely affect *acdh-1* promoter activity indirectly (MacNeil et al., 2015). For instance, the intestinal master regulator *elt-2* broadly controls intestinal gene expression and resides at the top of the hierarchy (MacNeil et al., 2015; McGhee et al., 2007). Knock down of either of the two TFs, *nhr-10* or *nhr-68*, had a strong effect on *acdh-1* promoter activity under propionate-supplemented conditions, and these TFs reside low in the gene regulatory network hierarchy (MacNeil et al., 2015). As TFs that reside low in the hierarchy tend to directly affect the promoter, this result suggests that *nhr-10* and *nhr-68* may be critical for propionate shunt activation. Indeed, deletion of either *nhr-10* or *nhr-68* greatly reduced *acdh-1* promoter activity, as well as endogenous *acdh-1* expression (Figures 2B and 2C). Quantitative analysis of GFP

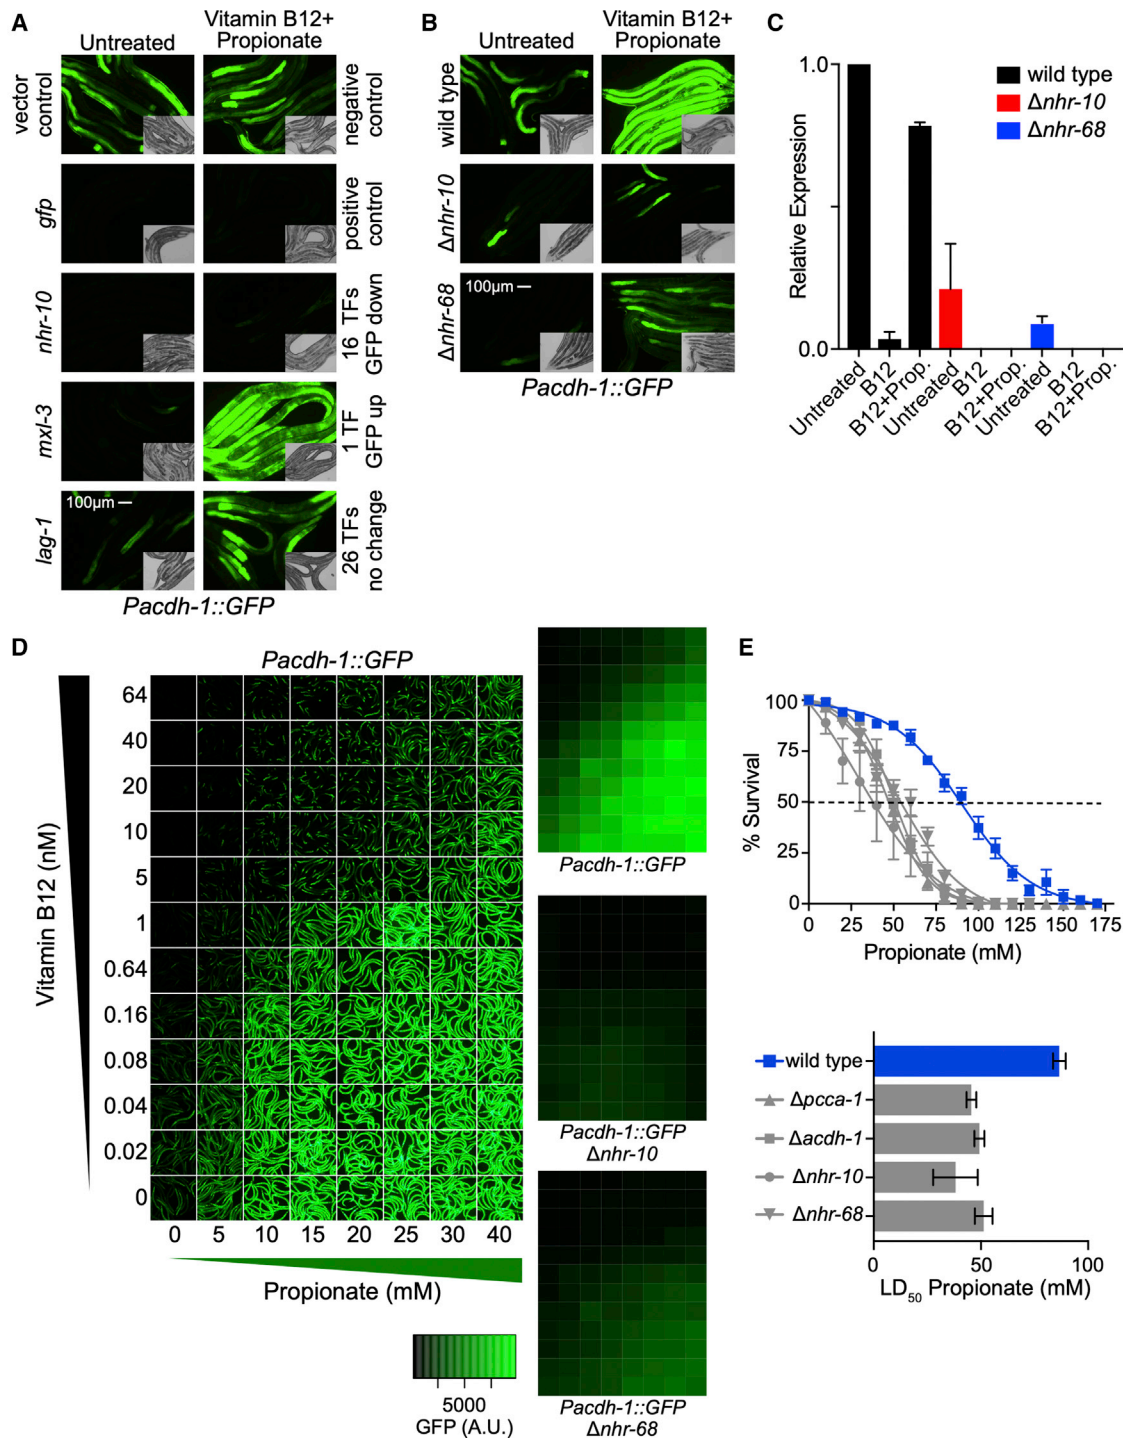

**Figure 2. The Nuclear Hormone Receptors NHR-10 and NHR-68 Mediate the Transcriptional and Functional Response to Excess Propionate**

(A) Fluorescent microscopy images of TF RNAi show that only a subset of TFs that activate the *acdh-1* promoter in animals fed *E. coli* HT115 bacteria are involved in the transcriptional response to excess propionate. Insets show differential interference contrast (DIC) images.

(B) The transcriptional response to excess propionate is greatly reduced in *nhr-10* and *nhr-68* deletion mutants, validating the TF RNAi results.

(C) qRT-PCR experiment showing that endogenous *acdh-1* expression is not induced in response to propionate in *nhr-10* and *nhr-68* deletion mutants.

(D) *nhr-10* and *nhr-68* are required for *acdh-1* promoter activation in a broad range of vitamin B12 and propionate concentrations. Left panel shows images of *Pacdh-1::GFP* animals supplemented with indicated concentrations of vitamin B12 and/or propionate. Right three panels show quantification of GFP levels at (legend continued on next page)

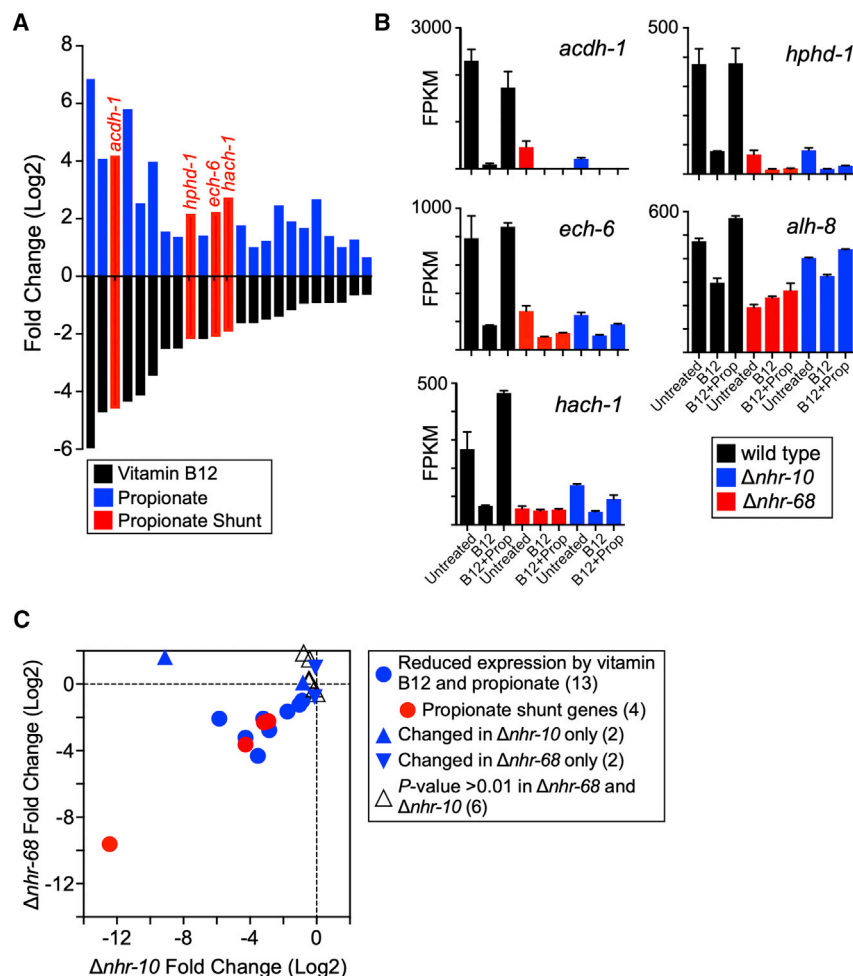

**Figure 3. Expression Profiling of *nhr-10* and *nhr-68* Deletion Mutant Animals**

(A) Bar graph showing the 23 genes that are significantly repressed by vitamin B12 and induced by propionate in wild-type animals, as identified by RNA-seq.

(B) Bar graph of RNA-seq fragments per kilobase of transcript per million mapped reads (FPKM) data showing that all five propionate shunt genes are activated by *nhr-10* and *nhr-68* in response to excess propionate.

(C) Scatterplot showing that 13 of the 23 genes repressed by vitamin B12 and induced by propionate are controlled by both *nhr-10* and *nhr-68*. Gene numbers for each condition are in parentheses.

both *nhr-10* and *nhr-68* deletion mutants are more sensitive to excess propionate than wild-type animals (Figure 2E). Importantly, deletion of either gene renders the animals equally sensitive to propionate as deletion of their transcriptional target *acdH-1*, which shows that both of these TFs are functionally important to mitigate propionate toxicity. Altogether, these data show that *nhr-10* and *nhr-68* are both required for transcriptional as well as functional activation of propionate shunt gene expression.

***nhr-10* and *nhr-68* Activate All Five Propionate Shunt Genes in Response to Excess Propionate**

So far, we have used the *PacdH-1::GFP* transgenic strain as a proxy for studying

propionate shunt activation. To investigate activation of the other four propionate shunt genes and to identify additional genes that are repressed by vitamin B12 and activated by propionate, we performed RNA sequencing (RNA-seq) on wild-type,  $\Delta nhr-10$ , and  $\Delta nhr-68$  mutant animals under untreated, vitamin B12 only, and vitamin B12 + propionate-supplemented conditions. We identified 23 genes that in wild-type animals are repressed by vitamin B12 and activated by propionate, including four of the five propionate shunt genes (Figure 3A). The fifth gene *alh-8* behaved similarly with an adjusted p value <0.01 but was just below our cutoff of a fold-change greater than or equal to 1.5 (Figure 3B; Table S1). Importantly, activation of 13 of these 23 genes required both *nhr-10* and *nhr-68*, including the propionate shunt genes (Figure 3C). This indicates that a larger gene battery than just the propionate shunt genes is under control of both NHRs and indicates that additional genes may be involved in propionate shunt metabolism or regulation.

expression in a broad range of vitamin B12 and propionate concentrations revealed that *nhr-10* and *nhr-68* are both required for *acdH-1* promoter activation under a broad range of propionate concentrations. Although *nhr-10* is absolutely required, there is still modest GFP expression in *nhr-68* deletion mutant animals (Figure 2D). These observations indicate that *nhr-10* and *nhr-68* together activate the expression of propionate shunt gene expression in response to excess propionate.

Are *nhr-10* and *nhr-68* functionally important to prevent the buildup of toxic propionate? We previously found that *acdH-1* expression under low vitamin B12 conditions is important to mitigate the effects of excess propionate (Watson et al., 2014, 2016). Specifically, the lethal dose 50 (LD<sub>50</sub>) of propionate in *acdH-1* mutant animals fed an *E. coli* diet low in vitamin B12 is similar to that of *pcca-1* deletion mutants, in which flux through the canonical propionate breakdown pathway is perturbed (Figures 1A and 2E) (Watson et al., 2014, 2016). Here, we found that

each concentration in *PacdH-1::GFP* animals in wild-type, *nhr-10*, or *nhr-68* deletion mutant animals. Quantification is the average of nine experiments: three biological replicates with three technical replicates each.

(E) Propionate toxicity assays show that *nhr-10* and *nhr-68* are functionally required to mitigate the toxic effects of propionate. Top panel shows propionate dose-response curves, and bottom panel shows LD<sub>50</sub> values.

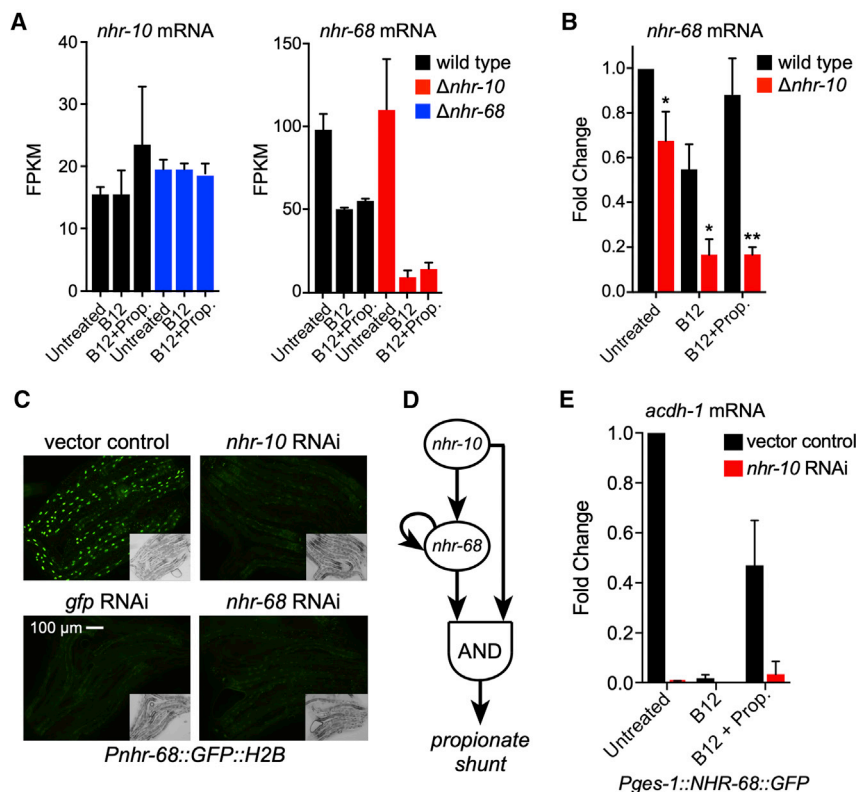

**Figure 4. *nhr-10* Activates *nhr-68* Expression and *nhr-68* Is an Autoactivator**

(A) Bar graph of RNA-seq data for *nhr-10* and *nhr-68* mRNA levels in the absence of *nhr-68* (left) and *nhr-10* (right).

(B) Bar graph showing qRT-PCR data for *nhr-68* mRNA levels in the absence of *nhr-10*. Statistical differences between wild-type and *nhr-10* deletion mutants were determined by two-tailed paired Student's t test (\* $p < 0.05$ , \*\* $p < 0.005$ ).

(C) Fluorescent microscopy images of RNAi of *nhr-10* or *nhr-68* shows reduced GFP expression in *Pnhr-68::GFP::H2B* transgenic animals. Insets show DIC images.

(D) Cartoon of the *nhr-10/nhr-68* gene regulatory network circuit.

(E) qRT-PCR shows that constitutive intestinal expression of NHR-68 under the control of the *ges-1* promoter does not induce *acdH-1* expression in response to propionate. All measurements are statistically significantly different compared to untreated vector control as determined by two-tailed paired Student's t test ( $p < 0.05$ ).

### *nhr-10* and *nhr-68* Function in a Coherent Type 1 FFL with an AND-Logic Gate

Although *nhr-10* mRNA levels are not affected by vitamin B12 or propionate supplementation, *nhr-68* expression is repressed by vitamin B12 and activated by propionate (Figures 4A and 4B). Interestingly, we found that *nhr-68* mRNA levels are reduced in *nhr-10* deletion mutant animals both by RNA-seq and by qRT-PCR (Figures 4A and 4B), which indicates that *nhr-10* activates the expression of *nhr-68*. RNAi of *nhr-10* in *Pnhr-68::GFP::H2B* transgenic animals led to a reduction in GFP expression compared to vector control RNAi, validating this result (Figure 4C). Interestingly, *nhr-68* RNAi also caused a reduction in GFP levels in this strain, indicating that *nhr-68* activates its own expression. Altogether, our observations indicate that *nhr-10* and *nhr-68* function in a specific type of circuit known as a coherent type 1 FFL with an AND-logic gate (Figure 4D). However, our data so far do not exclude the possibility that *nhr-10* and *nhr-68* function in a simple linear pathway where *nhr-10* activates *nhr-68* and *nhr-68* activates propionate shunt gene expression. To test this idea, we overexpressed *nhr-68* under the control of the promoter of moderately and highly constitutively expressed intestinal genes *ges-1* and *asp-5*, respectively. Neither of these genes is affected by vitamin B12 or propionate or by deletion of *nhr-10* (Figures S2A and S2B). We examined the induction of *acdH-1* expression by qRT-PCR either with vector control or with *nhr-10* RNAi in both strains. We found that, in these animals, *acdH-1* mRNA levels were repressed by vitamin B12 and induced by propionate, just as in wild-type animals (Figures 4E and S2C). However, *acdH-1* levels were greatly reduced

upon RNAi of *nhr-10*, indicating that *nhr-10* is absolutely required for propionate shunt activation. This finding demonstrates that activation of *nhr-68* by *nhr-10* is not sufficient for propionate shunt gene induction in response to propionate but rather that

the path leading from *nhr-10* to these genes is essential as well. This essential role of *nhr-10* is in agreement with our previous observation that this TF directly binds the *acdH-1* gene promoter (Arda et al., 2010; MacNeil et al., 2015). These observations indicate that *nhr-10* and *nhr-68* do not function in a simple linear genetic pathway but that they function in a more complex circuitry, represented by the type 1 coherent FFL in Figure 4D.

### The *nhr-10/nhr-68* Coherent Type 1 FFL with an AND-Logic Gate Functions as a Propionate Persistence Detector

Mathematical modeling of type 1 coherent FFLs with AND-logic gates has led to the prediction that such circuits function as persistence detectors that generate a delay in target gene expression and only activate downstream target genes when the input is sustained. This is because it takes time for the first TF in the circuit to activate the second and both are required (Alon, 2007). However, this prediction has so far only been experimentally substantiated using a synthetic circuit in *E. coli* (Mangan and Alon, 2003).

Next, we asked whether the *nhr-10/nhr-68* circuit may function as a genuine persistence detector. To do so, we tested two predictions based on previous modeling (Mangan and Alon, 2003): first that activation of *acdH-1* would exhibit a delay upon propionate supplementation, and second that a short pulse of propionate supplementation would not induce *acdH-1* activation. We first constitutively supplemented *PacdH-1::GFP* transgenic animals kept on vitamin B12 (GFP expression off) with propionate

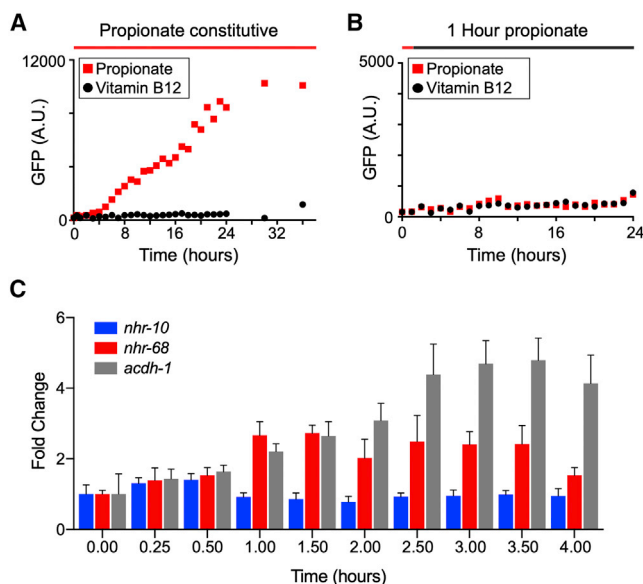

**Figure 5. *acdh-1* Expression Is Induced with a 3-Hr Delay in Response to Propionate and Does Not Respond to a 1-Hr Propionate Pulse**

(A) GFP expression in *Pacdh-1::GFP* animals transferred from vitamin B12 (black circles) to constitutive propionate supplementation (red squares) shows a ~3-hr delay.

(B) A 1-hr pulse of propionate does not induce GFP expression in *Pacdh-1::GFP* animals.

(C) qRT-PCR experiment of endogenous *nhr-10*, *nhr-68* and *acdh-1* expression upon propionate supplementation.

and quantified GFP expression every 30 min the first 2 hr and every hr for 22 hr and after 30 and 36 hr. As expected, GFP stayed off in animals that were constitutively supplemented with vitamin B12 (Figure 5A). When supplemented with propionate, however, GFP expression was robustly induced. Importantly, this induction occurred with a delay of ~3 hr. When *Pacdh-1::GFP* animals were given the same concentration of propionate, but only in a 1-hr pulse, GFP expression was not induced (Figure 5B). Finally, using qRT-PCR of endogenous *nhr-10*, *nhr-68* and *acdh-1* expression, we again found that *nhr-10* expression does not change with propionate, whereas *nhr-68* expression is modestly induced after about 1 hr, after which it stabilizes, followed by a longer induction of *acdh-1* mRNA. Note that the induction of the *acdh-1* mRNA is a bit faster than the induction of GFP expression in the reporter strain and that it tapers off, likely because of mRNA decay.

### ***nhr-68* Autoactivation Can Modulate the Delay in Persistence Detector Target Gene Activation**

Next, we asked how *nhr-68* autoactivation may contribute to the functionality of the persistence detector. For this, we modeled a type 1 coherent FFL with an AND-gate with autoregulation of *nhr-68* and simulated the system using Michaelis-Menten kinetics. We used the fitted experimental data from Figure 5A to estimate model parameters (Figure 6A; see STAR Methods). We then explored the interplay between *nhr-68* basal expression rate (characterized by the parameter,  $r$ ) and *nhr-68* autoregulatory

expression rate (characterized by  $r_A$ ) on the observed delay in target gene expression. Figure 6B shows a heatmap of delay times as a function of these two parameters over a broad range of values. Although precise quantitative values of the model parameters are not known, we found an interesting general feature of the circuit. Without autoactivation, the system has a tight range of predicted delay times that is relatively insensitive to the basal rate of induction and is set by the decay rates of the constituent TFs (Figure 6C). However, the inclusion of autoregulation of *nhr-68* enables a wide range of delays that are set by the basal expression rate (which, in our model, is controlled solely by *nhr-10*). In other words, small basal rates resulting from lower input signals would trigger longer delays in target gene expression, whereas strong input signals would trigger shorter delays and a quicker response (Figures 6C and 6D). To test this prediction, we supplemented *Pacdh-1::GFP* animals with different concentrations of propionate and examined the induction of GFP expression. Indeed, we found that higher concentrations of sustained propionate result in faster activation of GFP expression (Figure 6E).

Taken together, propionate shunt activation only occurs when propionate buildup is sustained and requires a transcriptional circuit involving *nhr-10* and *nhr-68* that function as a persistence detector in a type 1 coherent FFL with an AND-logic gate.

## **DISCUSSION**

We have discovered a transcriptional persistence detector in a multicellular organism. This persistence detector activates the five genes comprising the propionate shunt pathway in *C. elegans*. This pathway provides an alternative way to catabolize propionate, which is toxic when it accumulates in both humans and *C. elegans* (Deodato et al., 2006; Watson et al., 2016). Shunting of propionate occurs in both humans and *C. elegans*, as indicated by the detection of shunt pathway intermediates in propionic acidemia patients and individuals with mutations in other relevant genes (Ando et al., 1972; Deodato et al., 2006; Peters et al., 2015). However, although *C. elegans* has evolved a propionate shunt pathway that is transcriptionally induced when propionate accumulates, humans likely repurpose metabolic enzymes that function in other metabolic pathways (Watson et al., 2016).

Two observations indicate that *C. elegans* preferentially uses the canonical, vitamin B12-dependent propionate breakdown pathway, rather than the propionate shunt. First, the canonical pathway has not been lost in evolution, which would be expected if its function became obsolete. Second, the shunt pathway is inactive when flux through the canonical pathway is enabled by the sufficient dietary intake of vitamin B12. One reason for the preferential use of the canonical pathway is that the propionate shunt generates acrylate, which is much more toxic than propionate. Acrylate is produced in the first reaction in the propionate shunt where propionyl-CoA is converted into acrylyl-CoA (which can be interconverted with acrylate when the CoA is chemically or enzymatically removed) by the ACDH-1 enzyme (Figure 1). The next enzyme in the shunt pathway, ECH-6, then converts acrylyl-CoA into 3-hydroxypropionyl-CoA. We previously found that RNAi of *ech-6* renders the animals very sick and that double perturbation of *ech-6* with *acdh-1* suppresses

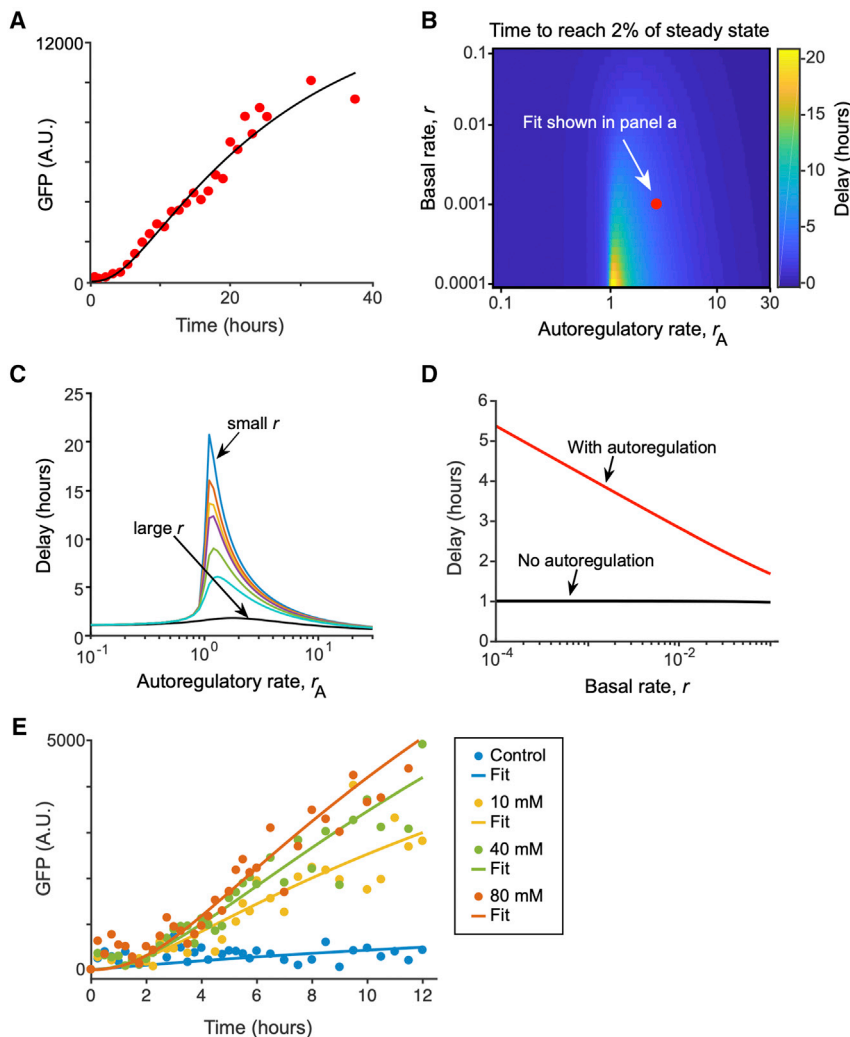

**Figure 6. Computational Modeling Shows That *nhr-68* Autoactivation Can Modulate the Delay in Target Gene Expression**

(A) Fit of propionate supplementation data from Figure 5A to estimate approximate parameter range. (B) Heatmap of delay time to reach 2% of steady state level of GFP based on the rate of basal expression,  $r$ , and the rate of autoregulation,  $r_A$ , of the *nhr-68* gene. (C) Delay time as a function of autoregulatory strength for several basal rates from the range of values examined in (B). (D) Delay time with autoregulation (using  $r_A$  found from C) and without autoregulation as basal rate is tuned. (E) Dynamics of *Pacdh-1::GFP* activation in response to different propionate concentrations.

of propionate detection by the persistence detector and how much intracellular propionate buildup is required to activate the circuit. Propionate is generated from odd-chain fatty acids, branched-chain amino acids, methionine, and threonine (Yilmaz and Walhout, 2016), and is catabolized in the mitochondria (Al-Lahham et al., 2010). How information involved in propionate shunt activation is transferred from the mitochondria and cytoplasm to NHRs in the nucleus is not known. It is tempting to speculate that NHR-10, NHR-68, or both directly interact with propionate, a three-carbon short-chain fatty acid, given that NHRs are known to use fatty acids as ligands (Evans and Mangelsdorf, 2014). However, the small size and volatility of propionate make detection of its interaction with proteins extremely challenging.

this phenotype (Watson et al., 2016). Our data indicate that *C. elegans* ensures that the shunt pathway stays off until it is really needed by using a transcriptional persistence detection mechanism.

The activation of shunt gene expression, as measured using the *Pacdh-1::GFP* reporter strain, occurs with a delay of  $\sim 3$  hr. This suggests that the response to excess propionate is on a relatively long timescale due to a relatively straightforward metabolite buildup rather than as a short-acting signal. Although our study illuminates the system-level mechanism of propionate persistence detection, the precise molecular mechanism remains to be elucidated. We previously found that NHR-10 physically binds the *acdH-1* promoter in yeast one-hybrid assays (Arda et al., 2010; MacNeil et al., 2015). We do not yet know whether it also interacts with the other shunt gene promoters. One possibility is that NHR-68 and NHR-10 physically interact to form a heterodimer. However, we did not detect any interactions with NHR-68 in our large-scale protein-DNA and protein-protein interaction studies (Fuxman Bass et al., 2016; Reece-Hoyes et al., 2013), so this remains to be investigated. We also do not yet know the mechanism

Several observations indicate that the persistence detector does not function in isolation and does not function solely to activate the expression of *acdH-1* and other genes but, rather, that it is embedded in a larger gene regulatory network. First, the set of downstream targets consists of at least 13 genes that are repressed by vitamin B12, activated by propionate, and dependent on both *nhr-10* and *nhr-68*. Aside from four shunt genes, this set contains nine genes, the function of which is largely unknown. It is likely that several of these genes function to support shunt function or to enable its shutdown when nutritional conditions favor the use of the canonical vitamin B12-dependent propionate breakdown pathway. Second, many additional TFs are involved in *acdH-1* expression (MacNeil et al., 2015; this study). These include 16 TFs that, when knocked down by RNAi, reduce *acdH-1* promoter activity either induced by propionate supplementation or under untreated conditions. Most of these TFs have a partial effect and reside higher in the hierarchy of the intestinal gene regulatory network (MacNeil et al., 2015) and likely affect the *acdH-1* promoter indirectly. RNAi of one TF, *mxl-3*, reduced *acdH-1* promoter activity on *E. coli* bacteria



but increased it under propionate-supplemented conditions. We did not follow up on this observation because we observed only very small effects on propionate shunt gene expression in *mxl-3* mutant animals (data not shown). Another set of 26 TFs regulate *acdh-1* under untreated conditions only, i.e., their knockdown has no effect on propionate-supplemented conditions. This finding indicates that *acdh-1* responds to other metabolites that act by other TFs. Interestingly, these TFs include *nhr-101* and *nhr-114*, which would be appealing candidates to mediate the response to other metabolites. It is interesting to note that *acdh-1* expression is not completely off in either *nhr-10* or *nhr-68* deletion mutant in the untreated condition (Figure 2D) and that this residual expression is repressed by vitamin B12. This observation suggests that other metabolites activating *acdh-1* may also be functionally connected to vitamin B12 metabolism. Moreover, it suggests that *acdh-1* may have a function outside the propionate shunt. Taken together, we discovered a persistence detector in a multicellular organism and linked this gene regulatory network architecture to a functional metabolic response in a whole animal.

## STAR★METHODS

Detailed methods are provided in the online version of this paper and include the following:

- KEY RESOURCES TABLE
- CONTACT FOR REAGENT AND RESOURCE SHARING
- EXPERIMENTAL MODEL AND SUBJECT DETAILS
  - *C. elegans* Strains
- METHOD DETAILS
  - RNA Interference
  - Propionate and Vitamin B12 Gradient Assays
  - Propionate Toxicity Assays
  - Expression Profiling
  - qRT-PCR
  - Propionate Pulse Experiments
  - Modeling FFL with Positive Autoregulation
- QUANTIFICATION AND STATISTICAL ANALYSES
- DATA AND SOFTWARE AVAILABILITY

## SUPPLEMENTAL INFORMATION

Supplemental Information includes two figures and two tables and can be found with this article online at <https://doi.org/10.1016/j.celrep.2018.12.064>.

## ACKNOWLEDGMENTS

We thank members of the Walhout lab and the faculty in the Program in Systems Biology for discussion and critical reading of the manuscript. This work was supported by NIH grant DK068429 to A.J.M.W. Some bacterial and nematode strains used in this work were provided by the *Caenorhabditis* Genetics Center (CGC), which is funded by the NIH Office of Research Infrastructure Programs (P40 OD010440).

## AUTHOR CONTRIBUTIONS

J.T.B. and G.E.G. performed all experiments with technical help from M.D.W.; L.S.Y. analyzed the RNA-seq data; Y.-U.L. generated the *Pnhr-68::GFP::H2B* construct; A.D.H. helped with analysis, writing, and making figures; M.Z.A. did the modeling shown in Figure 6 under supervision of R.C.B.; and A.J.M.W.

conceived the project and wrote the manuscript, with help from all other authors.

## DECLARATION OF INTERESTS

The authors declare no competing interests.

Received: September 13, 2018

Revised: November 6, 2018

Accepted: December 14, 2018

Published January 8, 2019

## REFERENCES

- Al-Lahham, S.H., Peppelenbosch, M.P., Roelofsen, H., Vonk, R.J., and Venema, K. (2010). Biological effects of propionic acid in humans; metabolism, potential applications and underlying mechanisms. *Biochim. Biophys. Acta* **1801**, 1175–1183.
- Alon, U. (2007). Network motifs: theory and experimental approaches. *Nat. Rev. Genet.* **8**, 450–461.
- Ando, T., Rasmussen, K., Nyhan, W.L., and Hull, D. (1972). 3-hydroxypropionate: significance of -oxidation of propionate in patients with propionic acidemia and methylmalonic acidemia. *Proc. Natl. Acad. Sci. USA* **69**, 2807–2811.
- Arda, H.E., Taubert, S., Conine, C., Tsuda, B., Van Gilst, M.R., Sequerra, R., Doucette-Stam, L., Yamamoto, K.R., and Walhout, A.J.M. (2010). Functional modularity of nuclear hormone receptors in a *Caenorhabditis elegans* metabolic gene regulatory network. *Mol. Syst. Biol.* **6**, 367.
- Babicki, S., Arndt, D., Marcu, A., Liang, Y., Grant, J.R., Maciejewski, A., and Wishart, D.S. (2016). Heatmapper: web-enabled heat mapping for all. *Nucleic Acids Res.* **44**, W147–W153.
- Brenner, S. (1974). The genetics of *Caenorhabditis elegans*. *Genetics* **77**, 71–94.
- Deodato, F., Boenzi, S., Santorelli, F.M., and Dionisi-Vici, C. (2006). Methylmalonic and propionic aciduria. *Am. J. Med. Genet. C. Semin. Med. Genet.* **142C**, 104–112.
- Dupuy, D., Bertin, N., Hidalgo, C.A., Venkatesan, K., Tu, D., Lee, D., Rosenberg, J., Svrikapa, N., Blanc, A., Carne, A., et al. (2007). Genome-scale analysis of in vivo spatiotemporal promoter activity in *Caenorhabditis elegans*. *Nat. Biotechnol.* **25**, 663–668.
- Evans, R.M., and Mangelsdorf, D.J. (2014). Nuclear receptors, RXR, and the Big Bang. *Cell* **157**, 255–266.
- Frøkjær-Jensen, C., Davis, M.W., Sarov, M., Taylor, J., Flibotte, S., LaBella, M., Pozniakovskiy, A., Moerman, D.G., and Jorgensen, E.M. (2014). Random and targeted transgene insertion in *Caenorhabditis elegans* using a modified Mos1 transposon. *Nat. Methods* **11**, 529–534.
- Fuxman Bass, J.I., Pons, C., Kozlowski, L., Reece-Hoyes, J.S., Shrestha, S., Holdorf, A.D., Mori, A., Myers, C.L., and Walhout, A.J.M. (2016). A gene-centered *C. elegans* protein-DNA interaction network provides a framework for functional predictions. *Mol. Syst. Biol.* **12**, 884.
- Kamath, R.S., Fraser, A.G., Dong, Y., Poulin, G., Durbin, R., Gotta, M., Kanapin, A., Le Bot, N., Moreno, S., Sohrmann, M., et al. (2003). Systematic functional analysis of the *Caenorhabditis elegans* genome using RNAi. *Nature* **421**, 231–237.
- Leng, N., Dawson, J.A., Thomson, J.A., Ruotti, V., Rissman, A.I., Smits, B.M., Haag, J.D., Gould, M.N., Stewart, R.M., and Kendziorski, C. (2013). EBSeq: an empirical Bayes hierarchical model for inference in RNA-seq experiments. *Bioinformatics* **29**, 1035–1043.
- Leung, C.K., Deonaraine, A., Strange, K., and Choe, K.P. (2011). High-throughput screening and biosensing with fluorescent *C. elegans* strains. *J. Vis. Exp.* **19**, 2745.
- MacNeil, L.T., Watson, E., Arda, H.E., Zhu, L.J., and Walhout, A.J.M. (2013). Diet-induced developmental acceleration independent of TOR and insulin in *C. elegans*. *Cell* **153**, 240–252.

- MacNeil, L.T., Pons, C., Arda, H.E., Giese, G.E., Myers, C.L., and Walhout, A.J.M. (2015). Transcription factor activity mapping of a tissue-specific *in vivo* gene regulatory network. *Cell Syst.* *1*, 152–162.
- Mangan, S., and Alon, U. (2003). Structure and function of the feed-forward loop network motif. *Proc. Natl. Acad. Sci. USA* *100*, 11980–11985.
- McGhee, J.D., Sleumer, M.C., Bilenky, M., Wong, K., McKay, S.J., Goszczynski, B., Tian, H., Krich, N.D., Khattri, J., Holt, R.A., et al. (2007). The ELT-2 GATA-factor and the global regulation of transcription in the *C. elegans* intestine. *Dev. Biol.* *302*, 627–645.
- Peters, H., Ferdinandusse, S., Ruiters, J.P., Wanders, R.J., Boneh, A., and Pitt, J. (2015). Metabolite studies in HIBCH and ECHS1 defects: implications for screening. *Mol. Genet. Metab.* *115*, 168–173.
- Reece-Hoyes, J.S., Pons, C., Diallo, A., Mori, A., Shrestha, S., Kadreppa, S., Nelson, J., Diprima, S., Dricot, A., Lajoie, B.R., et al. (2013). Extensive rewiring and complex evolutionary dynamics in a *C. elegans* multiparameter transcription factor network. *Mol. Cell* *51*, 116–127.
- Rual, J.-F., Ceron, J., Koreth, J., Hao, T., Nicot, A.-S., Hirozane-Kishikawa, T., Vandenhaute, J., Orkin, S.H., Hill, D.E., van den Heuvel, S., and Vidal, M. (2004). Toward improving *Caenorhabditis elegans* phenome mapping with an ORFeome-based RNAi library. *Genome Res.* *14*, 2162–2168.
- Watson, E., MacNeil, L.T., Arda, H.E., Zhu, L.J., and Walhout, A.J.M. (2013). Integration of metabolic and gene regulatory networks modulates the *C. elegans* dietary response. *Cell* *153*, 253–266.
- Watson, E., MacNeil, L.T., Ritter, A.D., Yilmaz, L.S., Rosebrock, A.P., Caudy, A.A., and Walhout, A.J.M. (2014). Interspecies systems biology uncovers metabolites affecting *C. elegans* gene expression and life history traits. *Cell* *156*, 759–770.
- Watson, E., Olin-Sandoval, V., Hoy, M.J., Li, C.-H., Lousse, T., Yao, V., Mori, A., Holdorf, A.D., Troyanskaya, O.G., Ralser, M., and Walhout, A.J. (2016). Metabolic network rewiring of propionate flux compensates vitamin B12 deficiency in *C. elegans*. *eLife* *5*, e17670.
- Yilmaz, L.S., and Walhout, A.J. (2016). A *Caenorhabditis elegans* genome-scale metabolic network model. *Cell Syst.* *2*, 297–311.

## STAR★METHODS

### KEY RESOURCES TABLE

| REAGENT or RESOURCE                                                | SOURCE                               | IDENTIFIER                                  |
|--------------------------------------------------------------------|--------------------------------------|---------------------------------------------|
| <b>Bacterial and Virus Strains</b>                                 |                                      |                                             |
| <i>Escherichia coli</i> OP50                                       | Caenorhabditis Genetics Center (CGC) | N/A                                         |
| <i>Escherichia coli</i> HT115                                      | CGC                                  | N/A                                         |
| <i>Escherichia coli</i> HT115 Ahringer RNAi Library                | (Kamath et al., 2003)                | N/A                                         |
| <i>Escherichia coli</i> HT115 ORFeome RNAi Library                 | (Rual et al., 2004)                  | N/A                                         |
| <b>Chemicals, Peptides, and Recombinant Proteins</b>               |                                      |                                             |
| Propionic Acid                                                     | Sigma Aldrich                        | Cat#: P1386                                 |
| Adenosyl Cobalamin                                                 | Sigma Aldrich                        | Cat#: C0884                                 |
| BP clonase II                                                      | ThermoFisher Scientific              | Cat#: 11789020                              |
| Isopropyl β-D-1 thiogalactopyranoside (IPTG)                       | US Biological                        | Cat#: I8500                                 |
| Levamisole Hydrochloride                                           | Sigma Aldrich                        | Cat#: PHR1798                               |
| Polyethylene Glycol                                                | Sigma Aldrich                        | Cat#: 202444                                |
| TRIzol Reagent                                                     | Life Technologies                    | Cat#: 15596-018                             |
| M-MuLV Reverse Transcriptase                                       | NEB                                  | Cat#: M0253                                 |
| Direct-zol RNA Mini Prep Kit                                       | Zymo Research                        | Cat#: R2050                                 |
| DNase I                                                            | NEB                                  | Cat#: M0303                                 |
| Oligo(dT) 12-18 Primer                                             | Invitrogen                           | Cat#: 18418012                              |
| RNaseOut                                                           | Invitrogen                           | Cat#: 10777019                              |
| Fast SYBR Green Master Mix                                         | ThermoFisher Scientific              | Cat#: 4385616                               |
| <b>Deposited Data</b>                                              |                                      |                                             |
| Raw and analyzed RNA-seq data                                      | This study                           | GEO: GSE123507                              |
| <b>Experimental Models: Organisms/Strains</b>                      |                                      |                                             |
| <i>Caenorhabditis elegans</i> N2 (wild type)                       | CGC                                  | N/A                                         |
| <i>C. elegans nhr-10(tm4695)</i>                                   | National Bioresource Project, Japan  | WormBase: WBVar00253059                     |
| <i>C. elegans nhr-68(gk708)</i>                                    | CGC                                  | Strain: VC1527 WormBase: WBVar00146032      |
| <i>C. elegans pcca-1(ok2282)</i>                                   | CGC                                  | Strain: RB1774 WormBase: WBVar00093442      |
| <i>C. elegans acdh-1(ok1489)</i>                                   | CGC                                  | Strain: VC1011 WormBase: WBVar00092700      |
| <i>C. elegans</i> wwIs24[Pacdh-1::GFP; unc-119(+)]                 | (MacNeil et al., 2013)               | Strain: VL749 WormBase: WBTransgene00018139 |
| <i>C. elegans nhr-10(tm4695); wwIs24[Pacdh-1::GFP; unc-119(+)]</i> | (MacNeil et al., 2013)               | Strain: VL868                               |
| <i>C. elegans nhr-68(tm708); wwIs24[Pacdh-1::GFP; unc-119(+)]</i>  | (Watson et al., 2013)                | Strain: VL1113                              |
| <i>C. elegans</i> wwSi28[Pnhr-68::GFP::H2B; unc-119(+)] II         | This study                           | Strain: VL1286                              |
| <i>C. elegans</i> wwSi29[Pges-1::NHR-68::GFP; unc-119(+)] II       | This study                           | Strain: VL1296                              |
| <i>C. elegans</i> wwSi30[Pasp-5::NHR-68; unc-119(+)] II            | This study                           | Strain: VL1297                              |
| <b>Oligonucleotides</b>                                            |                                      |                                             |
| List of Oligonucleotides                                           | This study                           | Table S2                                    |
| <b>Recombinant DNA</b>                                             |                                      |                                             |
| pDONR P4-P1R                                                       | (Dupuy et al., 2007)                 | N/A                                         |
| pDONR 221                                                          | ThermoFisher Scientific              | Cat#: 12536017                              |
| pDONR P2R-P3 (for <i>unc-54</i> 3' UTR)                            |                                      | N/A                                         |

(Continued on next page)

**Continued**

| REAGENT or RESOURCE            | SOURCE                  | IDENTIFIER                                                                                                  |
|--------------------------------|-------------------------|-------------------------------------------------------------------------------------------------------------|
| Software and Algorithms        |                         |                                                                                                             |
| StepOnePlus qPCR Software v2.3 | ThermoFisher Scientific | Cat#: 4376600                                                                                               |
| MATLAB                         | Mathworks               | <a href="https://www.mathworks.com/products/matlab.html">https://www.mathworks.com/products/matlab.html</a> |
| HeatMapper                     | (Babicki et al., 2016)  | <a href="http://www.heatmapper.ca">http://www.heatmapper.ca</a>                                             |

**CONTACT FOR REAGENT AND RESOURCE SHARING**

Further information and requests for reagents may be directed to and will be fulfilled by the Lead Contact, A.J.M. Walhout ([marian.walhout@umassmed.edu](mailto:marian.walhout@umassmed.edu)).

**EXPERIMENTAL MODEL AND SUBJECT DETAILS*****C. elegans* Strains**

N2 (Bristol) was used as the wild-type strain, and animals were maintained on nematode growth medium (NGM) at 20°C as described (Brenner, 1974). Transgenic strains VL1286 (*wwSi28[P<sub>nh</sub>r-68::GFP::H2B; unc-119(+)* II]), VL1296 (*wwSi29[P<sub>ges-1::NHR-68::GFP; unc-119(+)</sub>* II]), VL1297 (*wwSi30[P<sub>asp-5::NHR-68; unc-119(+)</sub>* II]) were developed by using the *Mos1*-mediated single-copy insertion (*MosSCI*) method (Frøkjær-Jensen et al., 2014) and the integrated transgenes were confirmed by PCR genotyping (Table S2).

**METHOD DETAILS****RNA Interference**

RNAi was performed as described (MacNeil et al., 2015) with or without supplementation of 5 nM vitamin B12 and 40 mM propionate. Changes in intestinal GFP were scored visually when samples contained a mix of L4 and young adult animals. Knockdowns were scored as positive when most animals in the well displayed a change in intestinal GFP. Changes in GFP levels in other tissues were not recorded. Experiments were performed five independent times. TFs that scored in at least three independent experiments were considered hits. All RNAi clones included in the final dataset were sequence-verified.

**Propionate and Vitamin B12 Gradient Assays**

L1 synchronized animals were grown on NGM media supplemented with a matrix of propionate (0 to 40 mM) and vitamin B12 (0 to 64 nM) concentrations. GFP fluorescence was measured using a Tecan Infinite M1000Pro microplate reader as described (Leung et al., 2011). Five adult animals were randomly picked in triplicate and transferred to a 384 well plate containing 35 μl of buffer (M9 buffer, 1 μM levamisole and 0.5% PEG). GFP intensity measurement was performed at 485nm/9nm excitation and 535nm/20nm emission spectra. Each experiment was performed in biological triplicate with three technical replicates each, and the fluorescence intensity of each biological replicate was averaged. The average fluorescence intensity was used to make the heatmap using the online tool <http://www.heatmapper.ca/expression/>.

**Propionate Toxicity Assays**

Propionate toxicity assays were performed as described previously (Watson et al., 2016). Approximately 100–200 synchronized L1 animals (hatched overnight, 20 hours post-bleach) were added to *E. coli* OP50-seeded 35 mm NGM agar plates containing various concentrations of pH-neutralized propionic acid. Each dose tested included two technical and three biological replicates. After 72 hours, animals that had developed past L1 stage were counted. The fraction surviving, *S*, as a function of propionic acid concentration, *[C]*, was fit to the following dose response curve:

$$S = S_{\infty} + \frac{(S_0 - S_{\infty})}{1 + ([LD50]/[C])^n},$$

where *S*<sub>0</sub> and *S*<sub>∞</sub> are the fraction of animals surviving at zero and at saturating concentrations of propionic acid and *n* is the Hill slope. The dose required to kill 50% of the population, LD<sub>50</sub>, was found by least-squares fit of these four parameters. Toxicity assays were performed in biological triplicate, and the average LD<sub>50</sub> was plotted ± SEM.

**Expression Profiling**

Animals were fed *E. coli* OP50 on NGM-agar supplemented with 10 nM vitamin B12. Animals were then grown on NGM-agar without vitamin B12 and synchronized for two generations by L1 arrest in M9 buffer for 18 hours post-treatment with buffered bleach. Animals

were then grown on NGM-agar alone, or on NGM-agar supplemented with either 20 nM vitamin B12 or 20 nM vitamin B12 and 40 mM propionate. Approximately 3000 L4 stage animals were harvested and washed three times in M9 buffer for each condition. Total RNA was isolated using Trizol (Invitrogen) followed by DNase I (NEB) treatment and cleanup using Direct-zol RNA Mini Prep kit (Zymo Research). Two biological replicates for each condition were sequenced. Sequencing was performed by BGI using BGISEQ-500 platform with a single-end 50 bp read length, and a minimum of 26 million reads per sample. Differential gene expression between samples was analyzed using the standard output of BGI bioinformatics pipeline using EBSeq (Leng et al., 2013) for identifying differentially expressed genes. Differentially expressed genes were selected based on a fold change of  $\geq \pm 1.5$ , and adjusted  $P$ -value  $\leq 0.01$ .

### qRT-PCR

qRT-PCR was performed as described previously (Watson et al., 2016). Briefly, synchronized L1 animals were grown on NGM-agar plates containing 20 nM vitamin B12 and/or 40 mM propionate seeded with *E. coli* OP50 and grown at 20°C until they reached to late L4 stage. About 1500 animals were harvested for each condition, in triplicate. Animals were washed in M9 buffer and total RNA was isolated using TRIzol Reagent (Life Technologies), following by DNaseI (NEB) treatment and cleanup with Direct-zol RNA Mini Prep Kit (Zymo Research). cDNA was prepared from RNA using Oligo(dT) 12-18 Primer (Invitrogen) and M-MuLV Reverse Transcriptase (NEB). qPCR was performed in technical triplicate per gene condition using the Applied Biosystems StepOnePlus Real-Time PCR system and Fast Sybr Green Master Mix (ThermoFisher Scientific). Relative transcript abundance was determined by using the  $\Delta\Delta C_t$  method (18546601) and normalized to averaged *ama-1* and *act-1* mRNA expression levels. Primer sequences are provided in Table S2.

### Propionate Pulse Experiments

L1 synchronized animals were grown on 10 nM vitamin B12 supplemented media seeded with *E. coli* OP50 until the adult stage. Animals were then transferred to 40 mM propionate supplemented media either constitutively, or for one hour, and transferred back to vitamin B12 supplemented media. During each transfer the animals were washed three times using M9 buffer. For each time point, five adult animals were randomly picked and transferred to a 384 well plate containing 35  $\mu$ l M9 buffer containing 1  $\mu$ M levamisole and 0.5% polyethylene glycol. GFP was measured at 485nm/20nm excitation and 535nm/20nm emission spectra as described above. Each experiment was performed in biological triplicate with three technical replicates each, and the fluorescence intensity of technical replicates were averaged for each biological replicate.

### Modeling FFL with Positive Autoregulation

In the coherent FFL motif with an AND-logic gate (Figure 4D), propionate causes *nhr-10* to activate *nhr-68* expression with a basal rate  $r$ , and both *nhr-10* and *nhr-68* jointly activate GFP expression through an AND logic-gate with a rate  $r_c$ . In the absence of the signal,  $r_c = 0$  due to the AND logic. Additionally, *nhr-68* autoactivates with rate  $r_A$ . Implicit in this model is the assumption that *nhr-10* acts as a switch; i.e., *nhr-10* is “on” in the presence of propionate and “off” in its absence, and that levels of *nhr-10* do not change with time. To model the dynamics of the system we used Michaelis-Menten kinetics to arrive at the following ODEs that describe the system. GFP expression driven by the *acdh-1* promoter in *Pacdh-1::GFP* transgenic animals was used as a proxy for propionate shunt expression:

$$\frac{d[nhr68]}{dt} = r + r_A \frac{[nhr68]}{k + [nhr68]} - \alpha_{nhr68} [nhr68],$$

$$\frac{d[GFP]}{dt} = r_c \frac{[nhr68]}{k + [nhr68]} - \alpha_{GFP} [GFP],$$

where  $\alpha$  is the degradation rate of *nhr-68* or GFP and  $k$  is the dissociation constant. We assumed the degradation rate of *nhr-68* to be relatively fast and set  $\alpha_{nhr68} = 1/\text{hour}$ . The decay rate of GFP, which is known to be very stable, was set to  $\alpha_{GFP} = 0.05/\text{hour}$  which is determined from fitting the decay of GFP signal over time when propionate is washed out; although  $\alpha_{GFP}$  does not have biological relevance, it impacts the dynamics of our measured signal and the rate of approach to steady state. The dissociation constant is set to 1. The steady state concentration of GFP is obtained by setting the ODEs to zero and solving for GFP and *nhr-68* levels. The delay time, defined as the time to reach 2% of the maximum GFP level, is numerically obtained by solving the ODEs using the ODE solver, ODE45, in MATLAB. We fit the data for  $r$ ,  $r_A$  and  $r_c$  in order to estimate the magnitude of these parameters. The role of autoregulation in the circuit was tested by varying the two contributions to *nhr-68* production (autoregulation, characterized by  $r_A$  and basal expression from *nhr-10* alone, characterized by  $r$ ) around these best-fit values. Adjusting the parameters  $k$  and  $\alpha_{nhr68}$  alter the fit parameters, however, the highlighted qualitative features of the circuit remain unchanged.

### **QUANTIFICATION AND STATISTICAL ANALYSES**

Error bars for FPKM numbers from RNA-seq experiments represent the standard deviation from the average of two experiments. Differentially expressed genes from the RNA-seq dataset were selected based on a fold change of 1.5 or more and a *P*-adjusted value of less than 0.01. The specific statistical parameters are represented in the figure legends of each figure.

### **DATA AND SOFTWARE AVAILABILITY**

The RNA-sequencing data files were deposited in the NCBI Gene Expression Omnibus (GEO) under accession number GEO: GSE123507.

**Cell Reports, Volume 26**

**Supplemental Information**

**A Persistence Detector for Metabolic**

**Network Rewiring in an Animal**

**Jote T. Bulcha, Gabrielle E. Giese, Md. Zufikar Ali, Yong-Uk Lee, Melissa D. Walker, Amy D. Holdorf, L. Safak Yilmaz, Robert C. Brewster, and Albertha J.M. Walhout**

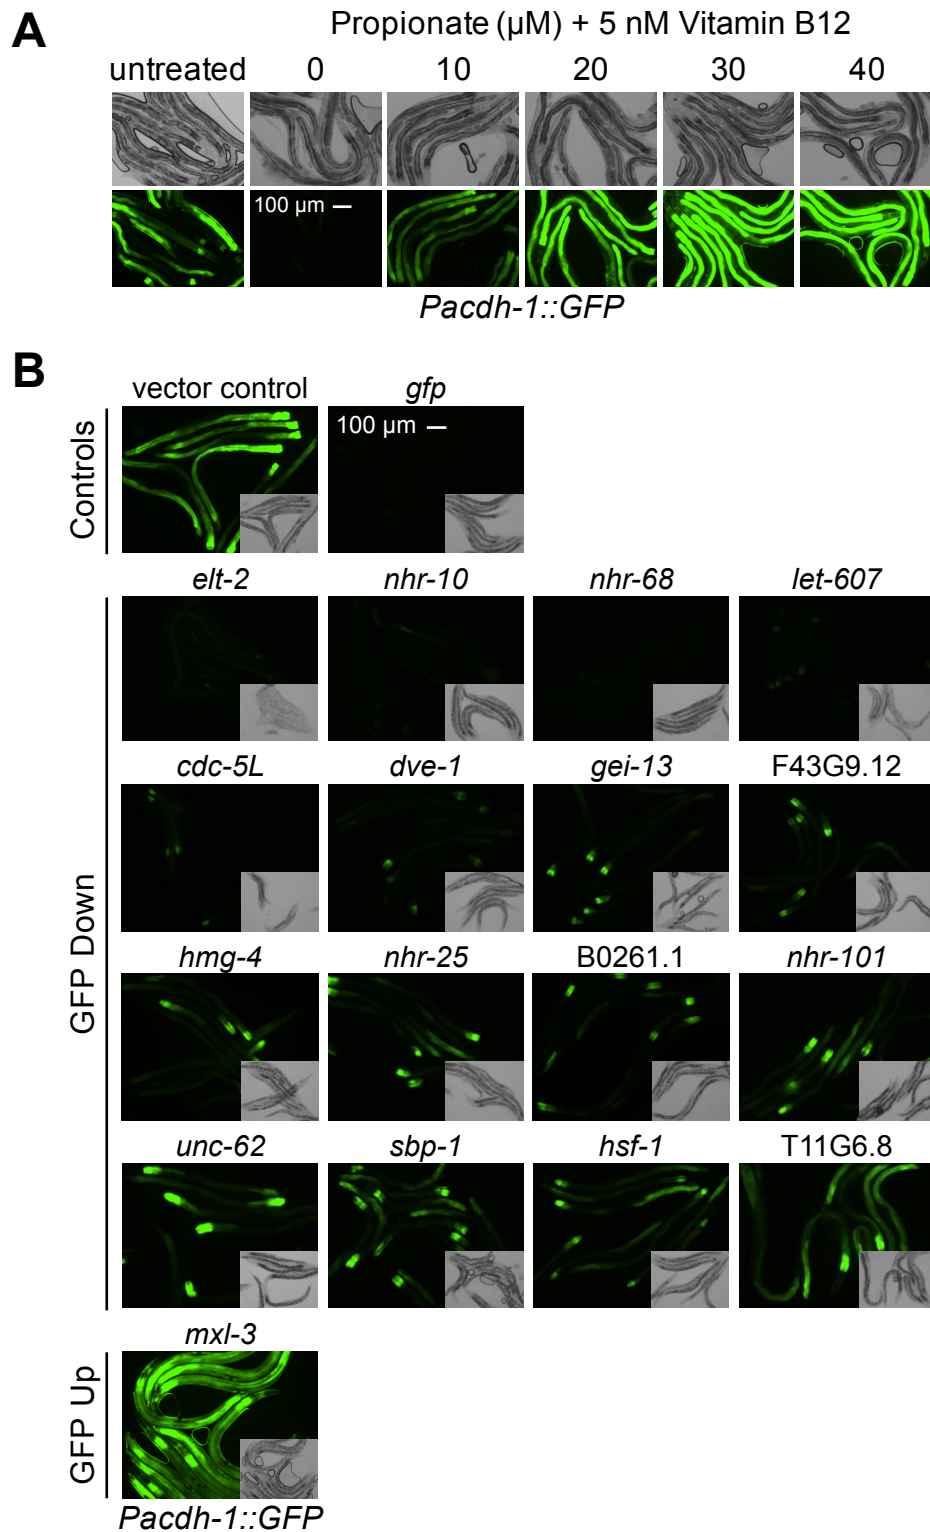

**Figure S1. Results of the TF RNAi screen for the increase or decrease of GFP expression in *Pacdh-1::GFP* transgenic animals in the presence of propionate. Related to Figure 2.**

(A) Fluorescence microscopy images (bottom) show that 5 nM vitamin B12 represses *Pacdh-1::GFP* while propionate supplementation in the presence of 5 nM vitamin B12 induces reporter activation in a dose dependent manner. Top images show DIC controls.

(B) Fluorescence microscopy images of all 17 TF RNAi experiments performed side-by-side with untreated animals and with animals supplemented with 5 nM vitamin B12 and 40 mM propionate. Insets show DIC images.



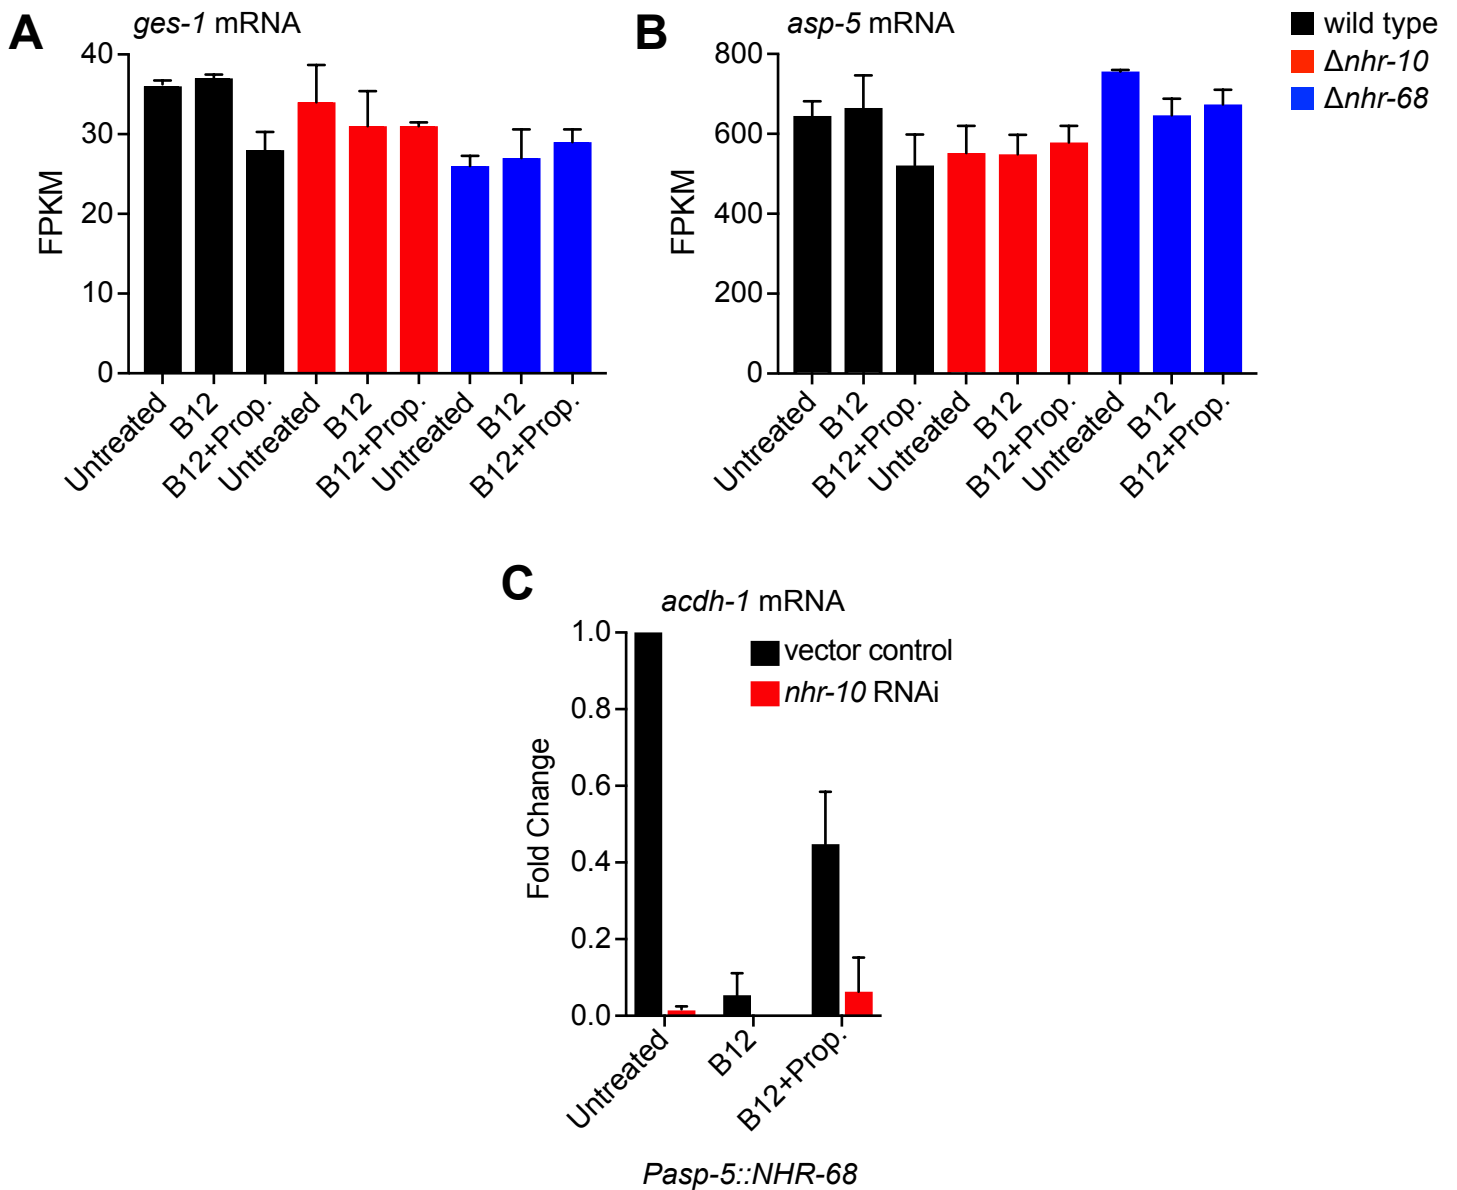

**Figure S2: Expression levels of *ges-1* and *asp-5* are not affected by vitamin B12, propionate, *nhr-10*, or *nhr-68*. Related to Figure 4.**

(A, B) Bar-graph of RNA-seq fragments per kilobase of transcript per million mapped reads (FPKM) data showing that expression levels of intestinal genes *ges-1* (low expression) and *asp-5* (high expression) are not affected by 20 nM vitamin B12, 40 mM propionate, *nhr-10* deletion, or *nhr-68* deletion.

(C) qRT-PCR showing that constitutive intestinal expression (*asp-5* promoter) of NHR-68 does not induce *acdh-1* expression in response to propionate. All measurements are statistically significantly different compared to untreated vector control as determined by two-tailed paired Student's t-test ( $P < 0.05$ ).

| Sequence Name | Gene Name      | Fold Change WT+B12 / WT (log2) | P-Adj    | Fold Change WT+B12+Prop / WT+B12 (log2) | P-Adj    | Fold Change $\Delta$ hr-10+B12+Prop / WT+B12+Prop | P-Adj    | Fold Change $\Delta$ hr-68+B12+Prop / WT+B12+Prop | P-Adj    |
|---------------|----------------|--------------------------------|----------|-----------------------------------------|----------|---------------------------------------------------|----------|---------------------------------------------------|----------|
| F38A5.14      | <i>nspb-1</i>  | -5.94692                       | 7.10E-09 | 6.8226                                  | 0        | -0.4181                                           | 0.935    | 1.51663                                           | 0.0880   |
| C17C3.12      | <i>acdH-2</i>  | -4.32705                       | 0        | 5.7681                                  | 0        | -9.1129                                           | 0        | 1.62773                                           | 0.8756   |
| C55B7.4       | <i>acdH-1</i>  | -4.57147                       | 0        | 4.1611                                  | 0        | -12.4294                                          | 0        | -9.6212                                           | 0        |
| C14F5.2       | <i>zig-3</i>   | -4.70019                       | 2.65E-04 | 4.0482                                  | 1.30E-10 | -3.5210                                           | 1.73E-09 | -4.3169                                           | 6.96E-12 |
| T13F3.6       | T13F3.6        | -3.42797                       | 2.05E-11 | 3.9539                                  | 9.68E-10 | -0.7734                                           | 0.379    | 1.86737                                           | 0.0668   |
| F09F7.4       | <i>hach-1</i>  | -1.90083                       | 1.42E-03 | 2.7035                                  | 0        | -3.1621                                           | 0        | -2.3058                                           | 0        |
| T07D3.9       | T07D3.9        | -0.90883                       | 1.36E-03 | 2.6420                                  | 0        | -2.8422                                           | 0        | -2.7636                                           | 0        |
| T05E12.7      | <i>srh-237</i> | -4.11875                       | 0        | 2.5031                                  | 1.52E-05 | -4.2733                                           | 1.08E-11 | -3.2203                                           | 1.02E-08 |
| F02E8.4       | F02E8.4        | -1.38412                       | 1.96E-03 | 2.4301                                  | 1.85E-10 | -0.0762                                           | 0.961    | 0.9924                                            | 5.44E-14 |
| T05G5.6       | <i>ech-6</i>   | -2.07524                       | 3.42E-06 | 2.2079                                  | 0        | -2.9039                                           | 0        | -2.2165                                           | 0        |
| Y38F1A.6      | <i>hphd-1</i>  | -2.15322                       | 3.00E-15 | 2.1450                                  | 0        | -4.2685                                           | 0        | -3.6272                                           | 0        |
| R06C7.4       | <i>cpg-3</i>   | -1.15400                       | 1.45E-05 | 1.8805                                  | 8.78E-05 | -0.4761                                           | 0.965    | 0.25138                                           | 0.9711   |
| F37B4.7       | <i>folT-2</i>  | -1.60076                       | 0        | 1.7434                                  | 0        | -5.8406                                           | 0        | -2.0716                                           | 0        |
| C23H5.8       | C23H5.8        | -0.92923                       | 1.46E-06 | 1.6491                                  | 0        | -3.2100                                           | 0        | -2.0744                                           | 0        |
| T10H9.5       | <i>pmp-5</i>   | -2.50304                       | 0        | 1.5272                                  | 1.08E-04 | -2.9140                                           | 7.77E-16 | -2.3058                                           | 3.14E-11 |
| W01B11.6      | W01B11.6       | -2.15102                       | 0        | 1.3826                                  | 3.69E-03 | -0.2024                                           | 0.931    | -0.32831                                          | 0.9183   |
| T01H3.4       | <i>perm-1</i>  | -0.90649                       | 9.11E-14 | 1.3658                                  | 3.58E-10 | -0.4194                                           | 0.852    | 0.23760                                           | 0.7895   |
| F31F4.15      | <i>fbxa-72</i> | -2.48535                       | 8.08E-05 | 1.3428                                  | 2.05E-14 | -0.1178                                           | 0.957    | -0.7745                                           | 4.42E-06 |
| F10D2.9       | <i>fat-7</i>   | -0.63870                       | 1.28E-03 | 1.2462                                  | 1.13E-13 | 0.0236                                            | 0.988    | -0.56937                                          | 0.0268   |
| C55B7.9       | <i>mdt-18</i>  | -1.47825                       | 0        | 1.2045                                  | 6.23E-12 | -0.8590                                           | 3.38E-06 | -0.9945                                           | 1.33E-10 |
| F18E2.1       | <i>pap1-1</i>  | -0.89541                       | 4.44E-16 | 0.9887                                  | 1.11E-16 | -1.7482                                           | 0        | -1.6519                                           | 0        |
| F28A12.4      | <i>asp-13</i>  | -1.59904                       | 0        | 0.9812                                  | 0        | -1.0392                                           | 0        | -1.2286                                           | 0        |
| VF13D12L.3    | VF13D12L.3     | -0.61847                       | 3.69E-13 | 0.6299                                  | 4.11E-14 | -0.8205                                           | 0        | 0.10498                                           | 0.9785   |

**Table S1, related to Figure 3:** RNA-seq fold change and P-adjusted values for the 23 genes up regulated by propionate and down regulated by vitamin B12 in wild type animals.

| <b>Genotyping</b>     | <b>Forward</b>               | <b>Reverse</b>                |
|-----------------------|------------------------------|-------------------------------|
| <i>acdH-1(ok1489)</i> | CTTCCAGCTAATGGGTGTTTCATGTTCC | CGCCATTGCAGCTTCTCGTAC         |
| <i>pcca-1(ok2282)</i> | GGGGCAACAAAACAGGGTGGTG       | CGAGCTTGAGAAGGCTGGAGC         |
| <i>nhr-10(tm4695)</i> | GCATACTCTAGAGGATCAAGCACC     | GTTTTCCGCGAATTCTCATTCCG       |
| <i>nhr-68(gk708)</i>  | GTTTTCTTTTTTCAACTGCACCATGTG  | CAATCACAGCCATTAATAATGTCTGCATG |
| MosSCI insert         | TCTGGCTCTGCTTCTTCGTT         | CAATTCATCCCGGTTTCTGT          |

| <b>qRT-PCR</b>         | <b>Forward</b>       | <b>Reverse</b>           |
|------------------------|----------------------|--------------------------|
| <i>acdH-1</i>          | GCAAATGCAGATCCTAGCC  | GTTTGTCTTCCTCCTTATCTACAG |
| <i>nhr-68</i>          | GCAATTTACAGATTTGGGCG | GCAATCCAAACAGCTTCCT      |
| <i>ama-1</i> (control) | AATATCTCGCAGGTTATCGC | GTGTACGATGACGGAAACC      |
| <i>act-1</i> (control) | CTCTTGCCCCATCAACCATG | CTTGCTTGGAGATCCACATC     |

**Table S2, related to the STAR Methods:** All DNA oligonucleotides used in this study.
